1 **DeepSleep: Fast and Accurate Delineation of Sleep Arousals at Millisecond Resolution by Deep**  
2 **Learning**

3 **running title: detecting sleep arousals by deep learning**

4 Hongyang Li<sup>1</sup>, Yuanfang Guan<sup>1,\*</sup>

5 1. Department of Computational Medicine and Bioinformatics, University of Michigan, 100 Washtenaw  
6 Avenue, Ann Arbor, MI 48109, USA

7 \* Corresponding author: [gyuanfan@umich.edu](mailto:gyuanfan@umich.edu)

8

9

10 Keywords: sleep arousals, automatic segmentation, deep learning, convolutional neural network,  
11 polysomnography, signal processing

12

13

14

15

16

17

18

19

20

21

22

23

24

25

26

## 27 **Abstract**

28 Sleep arousals are transient periods of wakefulness punctuated into sleep. Excessive sleep arousals are  
29 associated with many negative effects including daytime sleepiness and sleep disorders. High-quality  
30 annotation of polysomnographic recordings is crucial for the diagnosis of sleep arousal disorders. Currently,  
31 sleep arousals are mainly annotated by human experts through looking at millions of data points manually,  
32 which requires considerable time and effort. Here we present a deep learning approach, DeepSleep, which  
33 ranked first in the 2018 PhysioNet Challenge for automatically segmenting sleep arousal regions based on  
34 polysomnographic recordings. DeepSleep features accurate (area under receiver operating characteristic  
35 curve of 0.93), high-resolution (5-millisecond resolution), and fast (10 seconds per sleep record) delineation  
36 of sleep arousals.

37

## 38 **Main**

39 Sleep is important for our overall health and quality of life<sup>1</sup>. Inadequate sleep is often associated with many  
40 negative outcomes, including obesity<sup>2</sup>, irritability<sup>2,3</sup>, cardiovascular dysfunction<sup>4</sup>, hypotension<sup>5</sup>, impaired  
41 memory<sup>6</sup> and depression<sup>7</sup>. About one third of the general population in the United States are affected by  
42 insufficient sleep<sup>8</sup>. The prevalence of inadequate sleep results in large economic costs<sup>9</sup> and continues to  
43 increase in various nations<sup>10,11</sup>. Spontaneous sleep arousals, defined as brief intrusions of wakefulness into  
44 sleep<sup>12</sup>, are a common characteristic of brain activity during sleep. Excessive arousals due to disturbances  
45 can be harmful, resulting in fragmented sleep, daytime sleepiness and sleep disorders<sup>13,14</sup>. There are  
46 different types of arousing<sup>15</sup> stimulus, including obstructive sleep apneas or hypopneas, respiratory effort-  
47 related arousals (RERA), hyperventilations, bruxisms (teeth grinding), snoring, vocalizations, and leg  
48 movements. Together with sleep stages (wakefulness, stage1, stage2, stage3, and rapid eye movement),  
49 sleep arousals are labeled through visual inspections of polysomnographic recordings according to the  
50 American Academy of Sleep Medicine (AASM) scoring manual<sup>16</sup>. Of note, an 8-hour sleep record sampled  
51 at 200Hz with 13 different physiological measurements contains a total of 75 million data points. It takes  
52 hours to manually annotate such a large-scale sleep record.

53 Many research efforts have been made in developing computational methods for automatic arousal  
54 detection based on polysomnographic recordings<sup>17-21</sup>. These methods mainly focus on 30-second epochs,  
55 and extract statistical features in the time and frequency domains through Fourier transform or in-house  
56 feature engineering. These features and/or raw signals are subsequently fed into machine learning models  
57 to predict sleep arousals. However, due to the large differences of datasets and evaluation metrics used in  
58 previous studies, it remains unknown how to build an accurate and robust model to quickly delineate all  
59 sleep arousal events within a sleep record at a high resolution. In particular, how to preprocess the raw data  
60 or extract features before training models? Which types of machine learning models are well suited? What  
61 is the optimal input length (e.g. 30-second epochs or full-length records)? Which types of physiological  
62 signals should be used?

63 Here we investigate these questions and describe a novel deep learning approach, DeepSleep, for automatic  
64 detection of sleep arousals. This approach ranked first in the 2018 “You Snooze, You Win”  
65 PhysioNet/Computing in Cardiology Challenge<sup>22</sup>, in which state-of-the-art computational methods were  
66 systematically evaluated for predicting non-apnea sleep arousals on a large held-out test dataset<sup>23</sup>. The

67 workflow of DeepSleep is schematically illustrated in **Fig. 1**. We built a deep convolutional neural network  
68 (CNN) to capture long-range and short-range interdependencies between time points across an entire sleep  
69 record. Information at different resolutions and scales was integrated to improve the performance.  
70 Intriguingly, we found that similar EEG and EMG channels were interchangeable, which was used as a  
71 special augmentation in our approach. DeepSleep is able to delineate the sleep arousal profile of a sleep  
72 record at 5-millisecond resolution within 10 seconds.

73

## 74 Results

75

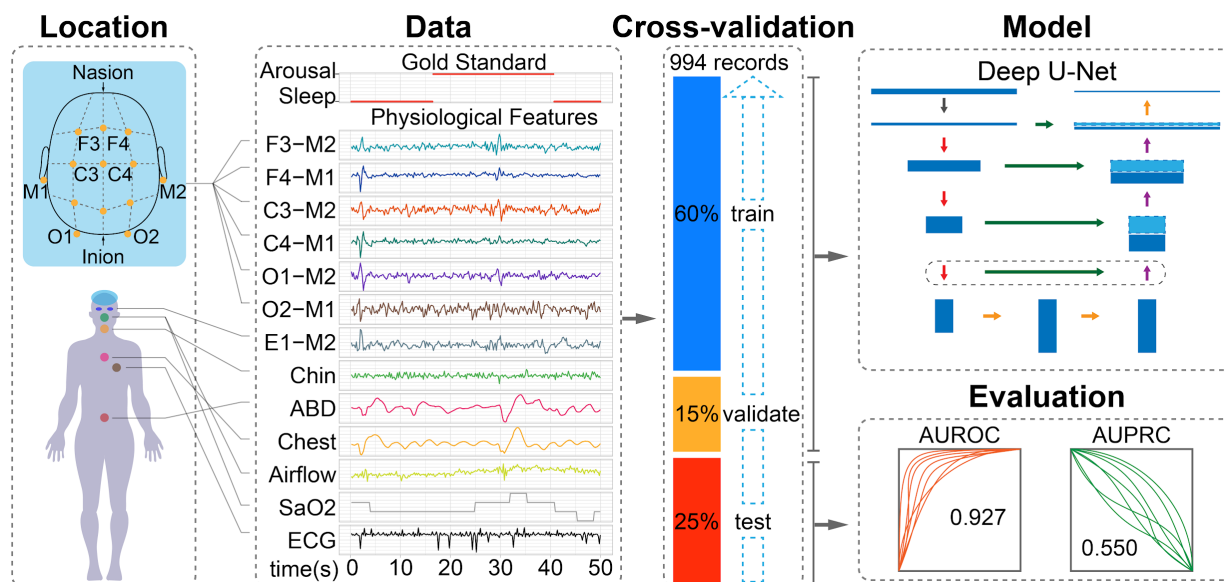

76

77 **Fig. 1. Schematic Illustration of DeepSleep workflow.**

78 **Location.** The 13-channel polysomnogram monitored multiple body functions, including brain activity  
79 (EEG), eye movement (EOG), muscle activity (EMG), and heartbeat (ECG). **Data.** A 50-second sleep  
80 record with the gold standard label of arousal/sleep and 13 physiological features. **Cross-validation.** In the  
81 nested train-validate-test framework, 60%, 15%, and 25% of the data were used to train, validate, and  
82 evaluate the model. **Model.** The classic U-Net architecture was adapted to capture the information at  
83 different scales and allowed for detecting sleep arousals at millisecond resolution. **Evaluation.** DeepSleep  
84 achieved high area under receiver operating characteristic curve (AUROC) of 0.927 and area under  
85 precision-recall curve (AUPRC) of 0.550 on the testing dataset.

## 86 Overview of the experimental design for predicting sleep arousals from polysomnogram

87 In this work, we used the 994 polysomnographic records provided in the 2018 PhysioNet challenge, which  
88 were collected at the Massachusetts General Hospital. In each record, 13 physiological measurements were  
89 sampled at 200Hz (Location and Data in **Fig. 1**), including six electroencephalography (EEG) signals at  
90 F3-M2, F4-M1, C3-M2, C4-M1, O1-M2 and O2-M1; one electrooculography (EOG) signal at E1-M2; three

91 electromyography (EMG) signals of chin, abdominal and chest movements; one measure of respiratory  
92 airflow; one measure of oxygen saturation (SaO<sub>2</sub>); one electrocardiogram (ECG). Each time point in the  
93 polysomnographic record was labeled as “Arousal” or “Sleep” by sleep experts, excluding some non-  
94 scoring regions such as apnea or hypopnea arousals. To exploit the information of the training records, we  
95 employed a nested train-validate-test framework, in which 60% of the data was used to train the neural  
96 network, 15% of the data was used to validate for parameter selection and 25% of the data was used to  
97 evaluate the performance of the model (Cross-validation in **Fig. 1**). To capture the long-range and short-  
98 range information at different scales, we adapted a classic neural network (Model in **Fig. 1**), U-Net, which  
99 was originally designed for image segmentation<sup>24</sup>. Multiple data augmentation strategies, including  
100 swapping similar polysomnographic channels, were used to expand the training data space and enable the  
101 generalizability of the model. Finally, the prediction performance was evaluated by the area under receiver  
102 operating characteristic curve (AUROC) and the area under precision-recall curve (AUPRC) on the held-  
103 out test dataset of 989 records (Evaluation in **Fig. 1**) during the challenge.

104

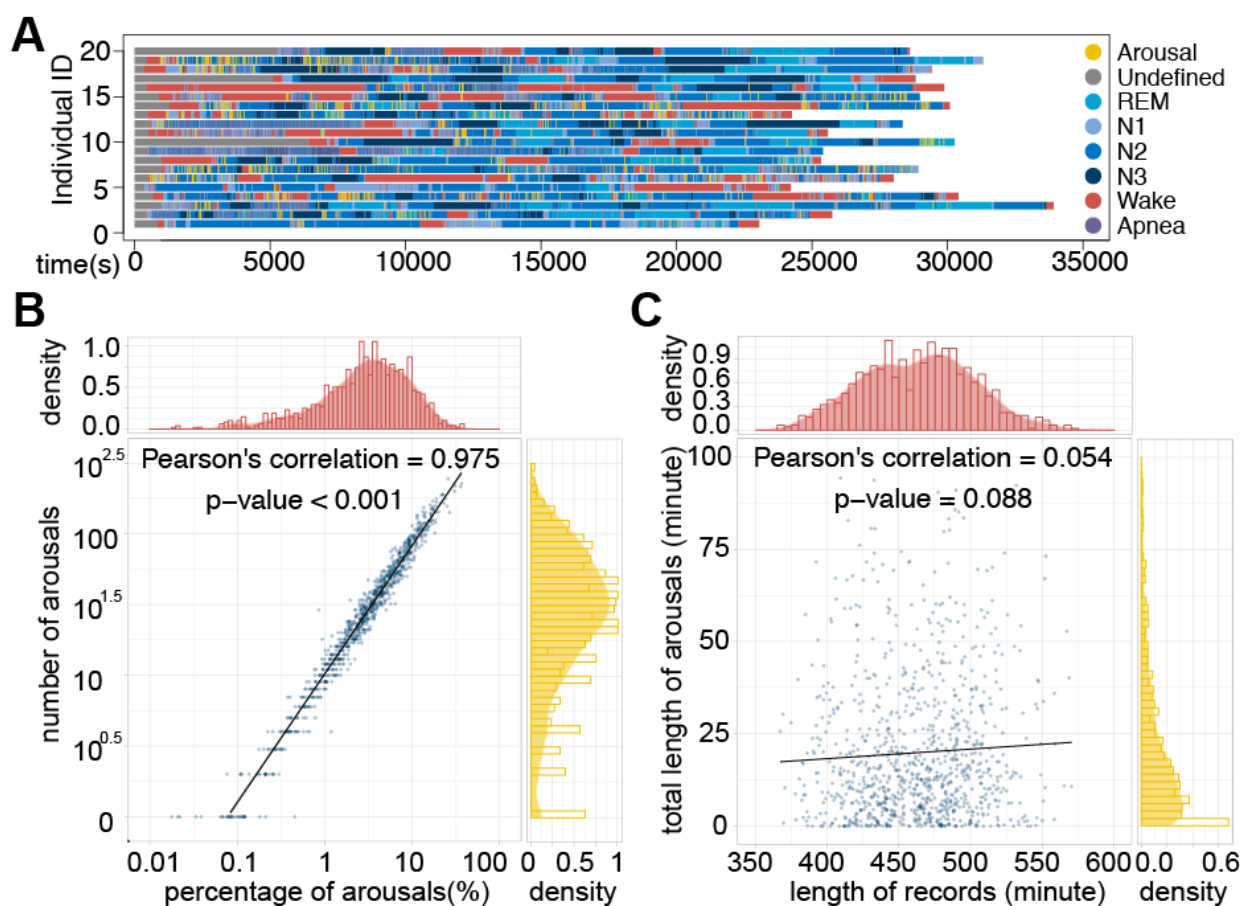

105

106 **Fig. 2. Sleep arousals sparsely distributed in the heterogeneous sleep records among individuals.**

107 (A) The 8 major annotation categories are shown in different colors for 20 randomly selected sleep records.  
108 The apneic and non-apneic arousal events overwrite sleep stages (N1, N2, N3, REM). (B) The relationship  
109 between the number of sleep arousals (y-axis) and the percentage of total sleep arousal time over total sleep

110 time (x-axis) in the 994 sleep records. In general, more arousal events lead to longer accumulated arousal  
 111 time and the correlation is significantly strong. (C) The length of sleep (x-axis) has no significant correlation  
 112 with the accumulated length of sleep arousals (y-axis).

### 113 Highly heterogeneous sleep records among individuals

114 By investigating the annotations of these sleep records, we found high levels of heterogeneity among  
 115 individuals. In **Fig. 2A**, we randomly selected sleep records of 20 individuals and presented the annotations  
 116 in different colors. There are 8 major annotation categories: “Arousal”, “Undefined”, “REM” (Rapid Eye  
 117 Movement), “N1” (Non-REM stage 1), “N2” (Non-REM stage 2), “N3” (Non-REM stage 3), “Wake” and  
 118 “Apnea”. The distribution of these categories differs dramatically among individuals (different colors in  
 119 **Fig. 2A**). Clearly, different individuals display distinct patterns of sleep, including the length of total sleep  
 120 time and multiple sleep stages. Notably, the sleep arousal regions are relatively short and sparsely  
 121 distributed along the entire record for most individuals (yellow regions in **Fig. 2A**).

122 We further investigated the occurrence of arousals and found that the median number of arousals during  
 123 sleep was 29, indicating the prevalence of sleep arousals. A total of 43 individuals (4.33%) had solid sleep  
 124 without any arousal, whereas 82 individuals (8.25%) had more than 100 arousals during their sleep (y-axis  
 125 in **Fig. 2B**), lasting around 10% of the total sleep duration (x-axis in **Fig. 2B**). In addition, there was no  
 126 significant correlation between the total sleep time and the total length of sleep arousals (**Fig. 2C**), which  
 127 was expected since the quality of sleep is not determined by sleep length. In summary, the intrinsically high  
 128 heterogeneity of sleep records across individuals rendered the segmentation of sleep arousals a very difficult  
 129 problem.

130

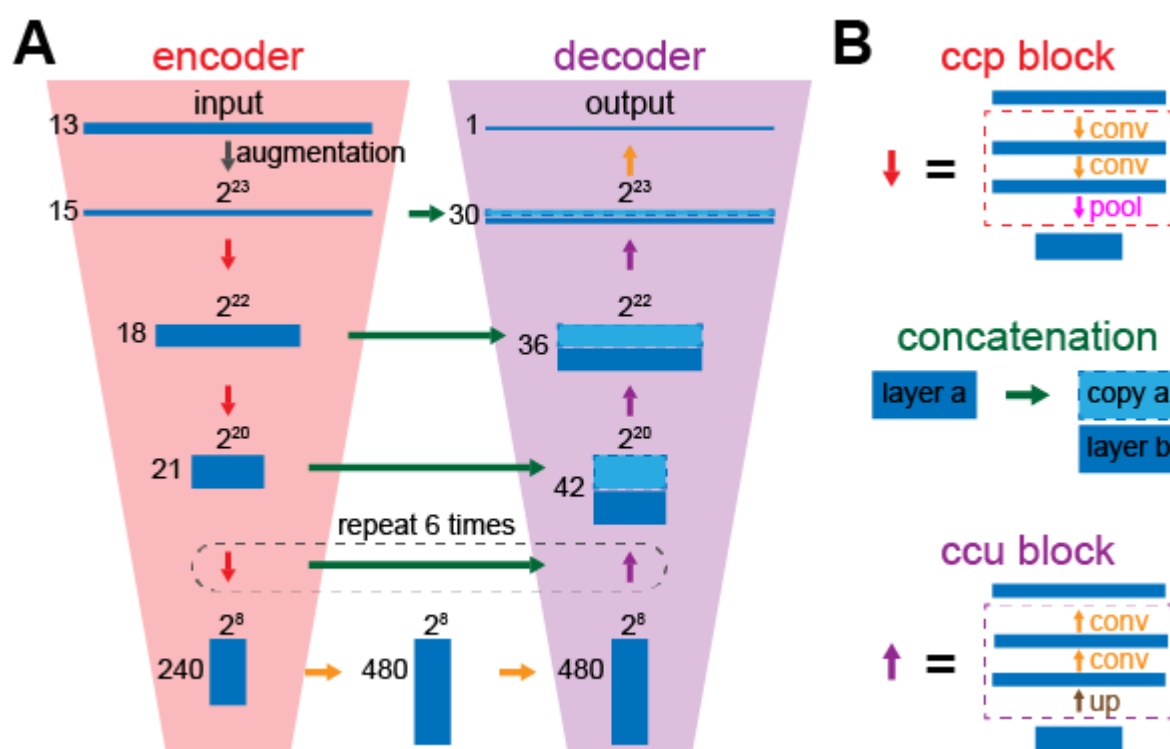

131

132 **Fig. 3. The deep convolutional neural network architecture in DeepSleep.**

133 (A) The classic U-Net structure was adapted in DeepSleep, which has two major components of the encoder  
134 (the red trapezoid on the left) and the decoder (the purple trapezoid on the right). (B) The building blocks  
135 of DeepSleep are the convolution-convolution-pooling block (red), the concatenation (green) and the  
136 convolution-convolution-upscaling block (purple). The orange arrow represents the convolution operation.

137 **Deep U-Net captures the long-range and short-range information at different scales and resolutions**

138 Current manual annotation of sleep arousals is defined by the AASM scoring manual<sup>16</sup>, in which sleep  
139 experts focus on a short period (less than a minute) and make decisions about sleep arousal events. However,  
140 it remains unclear whether the determinants of sleep arousals reside only within a short range, or long-range  
141 information across minutes and even hours plays an indispensable role in detecting sleep arousals. Although  
142 sleep arousal is in nature a transient event, it may be associated with the overall sleep pattern through the  
143 night. Intriguingly, when we trained the convolutional neural networks on longer sleep records, we  
144 consistently achieved better performances (**Fig. S1**). Therefore, we used the entire sleep record as input to  
145 make predictions, instead of small segments of a sleep record.

146 To learn the long-range association between data points across different time scales (second, minute, and  
147 hours), we develop an extremely deep convolutional neural network, which contains a total of 35  
148 convolutional layers (**Fig. 3A**). This network architecture has two major components, the encoder and the  
149 decoder. The encoder takes a full-length sleep record of  $2^{23} = 8,388,608$  time points and gradually encrypts  
150 the information into a latent space (the red trapezoid in **Fig. 3A**). Sleep recordings were centered, regardless  
151 of their original lengths, within the 8-million input space by filling in with zeros on their extremes. To be  
152 specific, the convolution-convolution-pooling (hereafter referred to as “ccp”) block is used to gradually  
153 reduce the size from  $2^{23} = 8,388,608$  to  $2^8 = 256$  (**Fig. 3B** top). Meanwhile, the number of channels gradually  
154 increases from 13 to 480 to encode more information, compensating the loss of resolution in the time  
155 domain. In each convolutional layer, the convolution operation is applied on the data along the time axis to  
156 aggregate the neighborhood information. Since the sizes of data in these convolutional layers are different,  
157 the encoded information is unique within each layer. For example, in the input layer, 10 successive time  
158 points sampled at 200Hz correspond to a short time interval of  $10/200=0.05$  seconds, whereas in the center  
159 layer (size =  $2^8$ ), 10 time points correspond to a much longer time interval of  $0.05 * 2^{23-8} = 1,638$  seconds,  
160 nearly 30 minutes. Therefore, this deep encoder architecture allows us to capture and learn about the  
161 interactions across data points at multiple time scales. The relationship between length of segments and the  
162 corresponding time can be found in **Table S1**.

163 Similar to the encoder, the second component of our network architecture is a decoder to decrypt the  
164 compressed information from the center latent space. In contrast to the “ccp” block, the convolution-  
165 convolution-upscaling (hereafter referred to as “ccu”) block is used (**Fig. 3B** bottom), which gradually  
166 increases the size and decreases the number of channels of the data (the purple trapezoid in **Fig. 3A**). In  
167 addition, concatenation is used to integrate the information from both the encoder and the decoder at each  
168 time scale (green horizontal arrows in **Fig. 3**). Finally, the output is the segmentation of the entire sleep  
169 record, where high prediction values indicate sleep arousal events and low values indicate sleep.

170

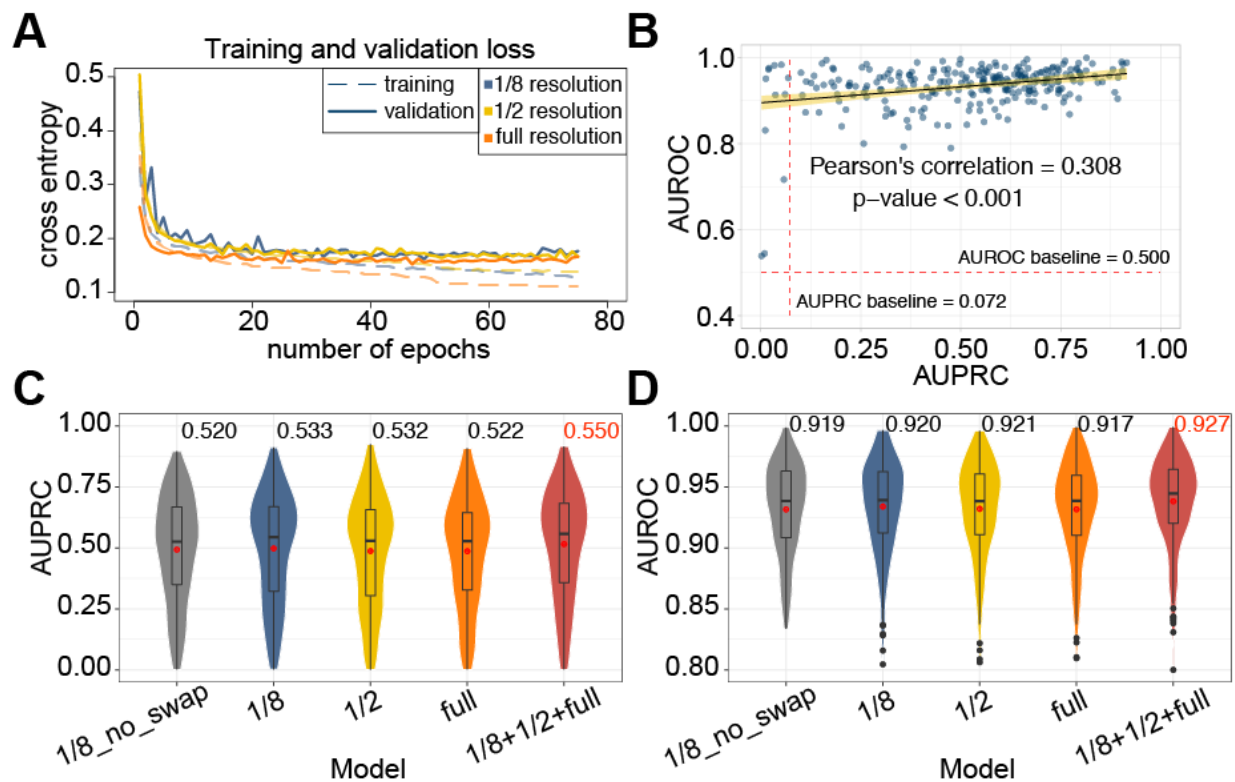

171

172 **Fig. 4. The performance comparison of DeepSleep using different model training strategies.**

173 (A) The training and validation cross entropy losses are shown in the dashed and solid lines, respectively.  
 174 The models using sleep records at different resolutions are shown in different colors. (B) The prediction of  
 175 each sleep record in the test set is shown as a blue dot in the AUROC-AUPRC space. A weak correlation  
 176 is observed between AUROCs and AUPRCs with a significant p-value < 0.001. The 95% percent  
 177 confidence interval is shown as the yellow bend. The baselines of random predictions are shown as red  
 178 dashed lines. The prediction (C) AUPRCs and (D) AUROCs of models using different resolution or  
 179 strategies were calculated. The “1/8\_no\_swap” model corresponds to the model using the “1/8”  
 180 records as input without any channel swapping, whereas the “1/8”, “1/2” and “full” models use the strategy  
 181 of swapping similar polysomnographic channels. The final “1/8+1/2+full” model of DeepSleep is the  
 182 ensemble of models at 3 different resolutions, achieving the highest AUPRC of 0.550 and AUROC of 0.927.  
 183

#### 184 Deep learning enables accurate predictions of sleep arousals

185 By capturing the information at multiple resolutions, DeepSleep achieves high performance in automatic  
 186 segmentation of sleep arousals. Since deep neural networks are iteration-based machine learning  
 187 approaches, a validation subset is used for monitoring the underfitting or overfitting status of a model and  
 188 approximating the generalization ability on unseen datasets. A subset of 15% randomly selected records  
 189 was used as the validation set during the training process (Cross-validation in Fig. 1) and the cross entropy  
 190 was used to measure the training and validation losses (see details in Materials and Methods). The 13  
 191 polysomnographic channels complemented each other and using all of them instead of one type of these  
 192 signals enabled the neural network to capture interactions between channels and achieved the highest

193 performance (**Fig. S2A-B**). We developed three basic models called “1/8”, “1/2” and “full”, according to  
194 the resolution of the neural network input. The “full” resolution means that the original 8-million ( $2^{23} =$   
195 8,388,608) length data were used as input. The “1/2” or “1/8” resolution means that the original input data  
196 were first shrunk to the length of 4-million ( $2^{22}$ ) or 1-million ( $2^{20}$ ) by averaging every 2 or 8 successive time  
197 points, respectively. We observed similar validation losses of the “full”, “1/2” and “1/8” models (solid lines  
198 in **Fig. 4A**). The final evaluation was based on the AUROC and AUPRC scores of predicting 25% of the  
199 data. In **Fig. 4B**, each blue dot represented one sleep record and we observed a significant yet weak  
200 correlation = 0.308 between the AUROCs and AUPRCs. The baselines of random predictions were shown  
201 as red dashed lines. Notably, the AUPRC baseline of 0.072 corresponded to the ratio of the average total  
202 sleep arousal length over the total sleep time, which was considerably low and made it a hard task due to  
203 the intrinsic sparsity of sleep arousal events.

204 To build a robust and generalizable model, multiple data augmentation strategies were used in DeepSleep.  
205 After carefully examining the data, we found that signals belonging to the same physiological categories  
206 were very similar and synchronized, including two EMG channels and six EEG channels (see Data in **Fig.**  
207 **1**). We applied a novel augmentation strategy by randomly swapping these similar channels during the  
208 model training process, assuming that these signals were interchangeable in determining sleeping arousals.  
209 There are three EMG channels but EMG-chin were not considered in this swapping strategy due to its  
210 differences from the other two EMG (ABD and chest) channels (see Data in **Fig. 1**). This channel swapping  
211 strategy was bold but effective, adapting which largely improved the prediction performance  
212 (“1/8\_no\_swap” versus “1/8” in **Fig. 4C-D**). In addition, we multiplied the polysomnographic signals by a  
213 random number between 0.90 and 1.15 to simulate the inherent fluctuation and noise of the data. Other  
214 augmentations on the magnitude and time scale were also explored (**Fig. S2C-D**). Furthermore, to address  
215 the heterogeneity and batch effects among individuals, we quantile normalized each sleep record to a  
216 reference, which was generated by averaging all the records. This step effectively removed the biases  
217 introduced by the differences of individuals and instruments, and Gaussian normalization was also tested  
218 and had slightly lower performance (**Fig. S2E-F**). Finally, we assembled the predictions from the “1/8”,  
219 “1/2” and “full” resolution models as the final prediction in DeepSleep (red violin plots in **Fig. 4C-D**).

220 We further compared different machine learning models and strategies in segmenting sleep arousals. We  
221 first tested a classical model, logistic regression, and found that our deep learning approach had a much  
222 higher performance (**Fig. S2G-H**). It has also been reported that neural network approaches significantly  
223 outperformed classical machine learning methods, including random forest, logistic regression<sup>25</sup>, support  
224 vector machine, and linear models<sup>26</sup>. In fact, 8 out of the top 10 teams used neural network models in the  
225 2018 PhysioNet Challenge (red blocks in **Fig. S3A**)<sup>22</sup>. Two types of network structures (convolutional and  
226 recurrent) were mainly used, and integrating Long Short-Term Memory (LSTM) or Gated Recurrent Unit  
227 (GRU) into DeepSleep did not improve the performance (**Fig. S3B-D**). In terms of input length, increasing  
228 input length significantly improved the performance, and full-length records were used by three teams (blue  
229 blocks in **Fig. S3A**). We also compared DeepSleep with recent state-of-the-art methods in sleep stage  
230 scoring. These methods extracted features from 30-second epochs through short-time Fourier transform  
231 (STFT)<sup>27,28</sup> or Thomson’s multitaper<sup>25,29</sup>. They were originally designed for automatic sleep staging and  
232 we applied them to the task of detecting sleep arousals on the same 2018 PhysioNet data. Although these  
233 methods performed well in sleep stage scoring, they were not well suited for arousal detection (**Fig. S3E-**  
234 **F**). Deep learning approaches can model informative features in an implicit way without tedious feature



235 crafting<sup>30</sup>, and neural networks using raw data as input were frequently used by half of the top 10 teams  
236 (orange blocks in **Fig. S3A**).

237 To comprehensively investigate the effects of various network structures and parameters on predictions, we  
238 further performed experiments with different modifications, including shallow neural network (**Fig. S4A-**  
239 **B**), average pooling (**Fig. S4C-D**), large convolution kernel size (**Fig. S4E-F**), and loss functions (**Fig.**  
240 **S4G-H**). These modifications had either similar or lower prediction performances. We concluded that the  
241 neural network architecture and augmentation strategies in DeepSleep were optimized for the current task  
242 of segmenting sleep arousals. Subsequent analysis of the relationships between the prediction performance  
243 and the number of arousal were investigated (**Fig. S5A-B**). As we expected, the prediction AUPRC was  
244 correlated with the number of arousals in a sleep record. The individuals who had more sleep arousals  
245 during sleep were relatively easier to predict. Moreover, we tested the runtime of DeepSleep with Graphics  
246 Processing Unit (GPU) acceleration and segmenting sleep arousals of a full sleep record can be finished  
247 within 10 seconds on average (**Fig. S5C-D**). The time cost of DeepSleep is much lower than that of manual  
248 annotations, which requires hours for one sleep record.

249 In addition to the 2018 PhysioNet dataset, we further validated our method on the large publicly available  
250 Sleep Heart Health Study (SHHS) dataset, which contains 6,441 individuals in SHHS visit 1 (SHHS1) and  
251 3,295 individuals in SHHS visit 2 (SHHS2)<sup>31</sup>. The SHHS is a multi-center cohort study, including  
252 participants from multiple different cohorts and the polysomnograms were annotated by sleep experts from  
253 different labs (<https://sleepdata.org/datasets/shhs>). The recording montages and signal sampling rates of  
254 SHHS1 and SHHS2 were quite different. For both SHHS1 and SHHS2, we randomly selected 1,000  
255 recordings, which was comparable to the number of recordings (n=994) in the PhysioNet training dataset.  
256 Then we applied DeepSleep pipeline to train, validate, and test models on SHHS1 and SHHS2 datasets  
257 individually. We observed similar performances of detecting sleep arousals on the PhysioNet, SHHS1, and  
258 SHHS2 datasets in **Fig. S6A-B**, demonstrating the robustness of our DeepSleep method.

259  
260 In the clinical setting, both apneic and non-apneic arousal are very important. We have therefore built neural  
261 network models for detecting apnea, in addition to the model for detecting non-apneic arousals, which was  
262 originally designed during the 2018 PhysioNet challenge. Specifically, we applied DeepSleep pipeline to  
263 the PhysioNet data and built three types of models for (1) detecting apneic arousals; (2) detecting non-  
264 apneic arousals; and (3) detecting all arousals (apneic and non-apneic arousals). DeepSleep is able to detect  
265 both apneic and non-apneic arousals (**Fig. S6C-D**).

266

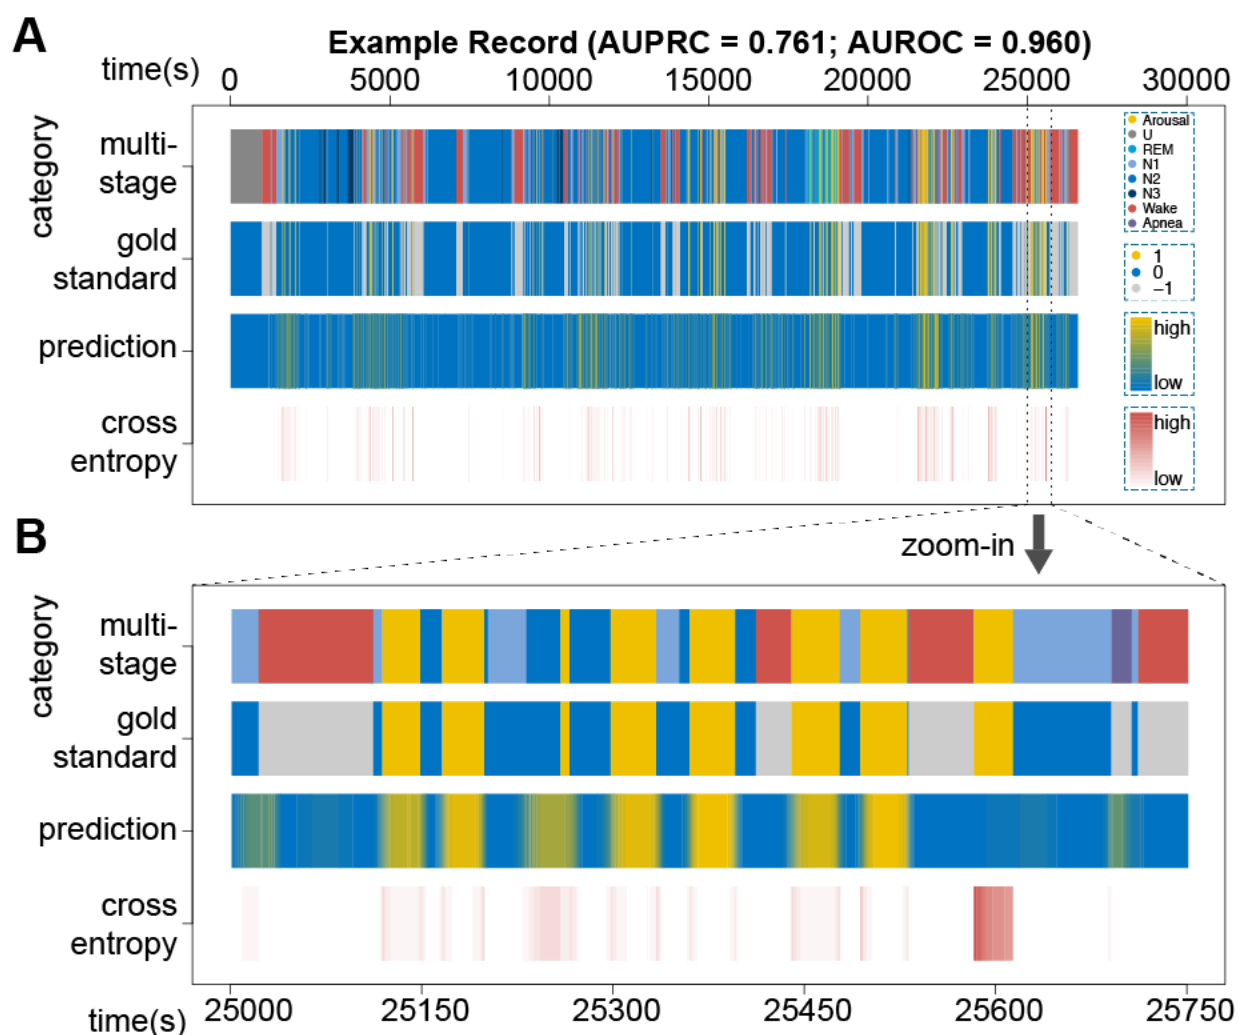

267

268 **Fig. 5. Visualization of DeepSleep predictions and the gold standard annotations.**

269 (A) A 7.5-hour sleep record (id=tr05-1034) with the prediction AUROC of 0.960 and AUPRC of 0.761 is  
 270 used as an example. From top to bottom along the y-axis, the four rows correspond to the 8 annotation  
 271 categories, the binary label of arousal (yellow), sleep (blue) and the non-scoring regions (gray), the  
 272 continuous prediction, and the cross-entropy loss at each time point along the x-axis. The wrongly predicted  
 273 regions lead to high cross entropy losses, which are shown in dark red at the bottom row. (B) The zoomed  
 274 in comparison of a 12.5-minute period of this sleep record.

### 275 Visualization of DeepSleep predictions

276 In addition to the abstract AUROC and AUPRC scores, we directly visualized the prediction performance  
 277 of DeepSleep at 5-millisecond resolution (corresponding to the 200Hz sample rate). An example 7.5-hour  
 278 sleep record with the prediction AUROC of 0.960 and AUPRC of 0.761 is shown in **Fig. 5**. More examples  
 279 at 3 rank percentiles (25%, 50%, and 75%) based on the AUPRC values can be found in **Fig. S7**. From top  
 280 to bottom, we plotted the multi-stage annotations, sleep arousal labels, predictions and cross-entropy losses  
 281 long the time x-axis. By comparing the prediction and gold standard, we can see the general prediction

282 pattern of DeepSleep correlates well with the gold standard across the entire record (the second and third  
283 rows in **Fig. 5A**). We further zoom into a short interval of 12.5 minutes and DeepSleep successfully  
284 identifies and segments seven sleep arousal events out of eight (yellow in **Fig. 5B**), although one arousal  
285 around 25,600 is missed. Intriguingly, DeepSleep predictions display a different pattern from the gold  
286 standard annotated by sleep experts: DeepSleep assigns continuous prediction values with lower  
287 probabilities near the arousal-sleep boundaries, whereas the gold standard is strictly binary either arousal =  
288 1 or sleep = 0 based on the AASM scoring manual<sup>16</sup>. This becomes clearer when examining the cross  
289 entropy loss at each time point and the boundary region has higher losses shown in red (the bottom row in  
290 **Fig. 5B**). This is expected because in general we will have a higher confidence of annotation in the central  
291 region of sleep arousal or other sleep events. Yet due to the limit of time and effort, it is practically infeasible  
292 to introduce rules for manually annotating each time point via a probability scenario. Additionally, binary  
293 annotation of sleep records containing millions of data points has already required significant effort.  
294 DeepSleep opens a new avenue to reconsider the way of defining sleep arousals or other sleep stage  
295 annotations by introducing the probability system.

296

## 297 **Discussion**

298 In this study, we created a deep learning approach, DeepSleep, to automatically segment sleep arousal  
299 regions in a sleep record based on the corresponding polysomnographic signals. A deep convolutional  
300 neural network architecture was designed to capture the long-range and short-range interactions between  
301 data points at different time scales and resolutions. Unlike classical machine learning models<sup>32</sup>, deep  
302 learning approaches do not depend on manually crafted features and can automatically extract information  
303 from large datasets in an implicit way<sup>33</sup>. Using classical approaches to define rules and craft features for  
304 modelling sleep problems in real life would become much too tedious. In contrast, without assumptions and  
305 restrictions, deep neural networks can approximate complex mathematical functions and models to address  
306 those problems. Currently, these powerful tools have also been successfully applied to biomedical image  
307 analysis and signal processing<sup>34,35</sup>. Compared with classical machine learning models, deep learning is a  
308 “black box” method which is relatively hard to interpret and understand. Meanwhile, deep learning  
309 approaches usually requires more computational resources such as GPUs, whereas most classical machine  
310 learning models can run on common CPUs.

311 Overfitting is a common issue in deep learning models, especially when the training dataset is small and  
312 the model is complex. Even if we use a large dataset and perform cross-validation, we will gradually and  
313 eventually overfit to the data. This is because each time we evaluate a model using the internal test set, we  
314 probe the dataset and fit our model to it. In contrast to previous studies, the 2018 PhysioNet Challenge  
315 offered us a unique opportunity to truly evaluate the performances and compare cutting-edge methods on a  
316 large external hidden test set of 989 samples<sup>23</sup>. In addition, we demonstrate that deep convolutional neural  
317 networks trained on full-length records and multiple physiological channels have the best performance in  
318 detecting sleep arousals, which are quite different from current approaches extracting features from short  
319 30-second epochs<sup>25,27,30</sup>. Beyond sleep arousals, we propose that the U-Net architecture used in DeepSleep  
320 can be adapted to other segmentation tasks such as sleep staging. A multi-tasking learning approach can be  
321 further implemented as the outputs of U-Net to directly segment multiple sleep stages simultaneously based  
322 on polysomnograms.

323 An interesting observation is that when we used records of different lengths as input to train deep learning  
324 models, the model using full-length records largely outperformed models using short periods of records.  
325 This observation brings about the question of how to accurately detect sleep arousals based on  
326 polysomnography. Current standards mainly focus on short time intervals of less than one minute<sup>16</sup>, yet  
327 the segmentations among different sleep experts are not very consistent in determining sleep arousals. One  
328 reason is that it is hard for humans to directly read and process millions of data points at once. In contrast,  
329 computers are good at processing large-scale data and discover the intricate interactions and structures  
330 between data points across seconds, minutes and even hours. Our results indicate that sleep arousal events  
331 are not be solely determined by the local physiological signals but associated with much longer time  
332 intervals even spanning hours. It would be interesting to foresee the integration of computer-assisted  
333 annotations to improve definitions of sleep arousals or other sleep stages.

334 In addition to the unique long-range information captured by DeepSleep, a clear advantage of computational  
335 approaches lies in the annotations for the boundary regions between arousal and sleep. Since current sleep  
336 annotations are binary only, it would be a more accurate and appropriate approach to introduce the  
337 probability of the annotation confidence, especially at the boundary regions. Machine learning approaches  
338 such as DeepSleep naturally provide the continuous predictions for each time point. It would be interesting  
339 to see improved annotation systems using continuous values instead of binary labels. A simple approach  
340 could be directly integrating the computer predictions with annotations by human sleep experts. The  
341 proposed annotation systems would provide more accurate information for the diagnosis of sleep disorders  
342 and the evaluation of sleep quality in the future.

343

## 344 **Materials and Methods**

### 345 **Polysomnographic recordings**

346 The dataset used in this study contains a total of 994 polysomnographic sleep records from different  
347 individuals and their corresponding labels at each time point. Specifically, the arousal region is labeled by  
348 “1” and other sleep regions are labeled by “0”, except for the wakefulness regions, apnea arousal regions  
349 and hypopnea arousal regions labeled by “-1”. These “-1” regions will not be scored in the challenge, and  
350 we mainly focused on non-apnea arousals that interrupted the sleep of an individual, including  
351 spontaneous arousals, respiratory effort related arousals (RERA), bruxisms, hypoventilations, hypopneas,  
352 apneas (central, obstructive and mixed), vocalizations, snores, periodic leg movements, Cheyne-Stokes  
353 breathing or partial airway obstructions (<https://physionet.org/challenge/2018/>). The final test dataset  
354 consists of 989 unseen polysomnographic recordings from different individuals. For each time point  
355 sampled at 200Hz in each test sleep record, the participants needed to provide a prediction value between  
356 0 and 1. A 8-hour sleep record contained nearly 75 million data points ( $8*60*60*200*13=74,880,000$ ).  
357 Our model made predictions for all the time points, at the resolution of 5 milliseconds ( $1/200\text{Hz} = 5$   
358 milliseconds).

### 359 Partition of the training, validation and testing sleep records

360 The 994 sleep records were randomly partitioned into three sets: 60% of them as the training set, 15% of  
361 them as the validation set and 25% of them as the testing set. The validation set was used for monitoring  
362 the training-validation losses and avoiding the problems of overfitting or underfitting.

### 363 Gaussian normalization

364 The Gaussian normalization is calculated by

$$365 x'_i = (x_i - \bar{x}) / s_x$$

366

367

$$\bar{x} = \frac{1}{N} \sum_{i=1}^N x_i$$

368

369

$$s_x = \frac{1}{N-1} \sum_{i=1}^N (x_i - \bar{x})^2$$

370 where  $x_i$  is the original value at time point  $i$ ,  $x'_i$  is the normalized value at time point  $i$ , and  $N$  is the total  
371 number of time points. For the polysomnographic signals, we normalized each channel individually.

372

### 373 Quantile normalization

374 For each polysomnographic channel, we first ranked the original input vector

375

$$x_1, x_2, \dots, x_N$$

376 into a sorted vector in the increasing order

377

$$x^1_{i1}, x^2_{i2}, \dots, x^N_{iN}$$

378 where superscript number denotes the ranked increasing order, and the subscript number denotes the  
379 original position before ranking. Then we replace this sorted vector with a sorted reference vector

380

$$\text{ref}^1, \text{ref}^2, \dots, \text{ref}^n$$

381 which is also in the increasing order. For example,  $x^k_{ik}$  will be replaced by  $\text{ref}^k$ . Then we changed the order  
382 back and mapped  $\text{ref}^k$  to its original position  $ik$ . After this quantile normalization, the overall distribution  
383 of the input vector has been mapped to the distribution of the reference vector. The reference vector was  
384 pre-calculated by averaging all the sorted recordings in the training dataset. We quantile normalized each  
385 recording to the same reference to address potential batch and cohort effects. Each polysomnographic  
386 channel was normalized individually.

387

### 388 AUROC and AUPRC

389 Since sleep arousal events are extremely rare (<10% in terms of length), the performances of different  
390 methods are not apparent in the Receiver Operating Characteristic (ROC) curve, where the y-axis is the  
391 True Positive Rate (TPR) and the x-axis is the False Positive Rate (FPR). The TPR and FPR are defined as

392

$$TPR = \frac{TP}{TP + FN}$$

393

$$FPR = \frac{FP}{FP + TN}$$

394 where TP is True Positive, FN is False Negative, FP is False Positive, and TN is True Negative. This is  
395 because when the number of negative events (“Sleep”; 92.8%), or TN, is much larger than the positive ones  
396 (“Arousal”; 7.2%), the FPR is always very small and will barely change even if a poor model makes many  
397 FP predictions. Therefore, in addition to the commonly used AUROC, we evaluated our model and various  
398 strategies using ARPRC<sup>36,37</sup>. In the Precision-Recall space, the Precision and Recall are defined as

$$399 \quad \textit{Precision} = \frac{TP}{TP + FP}$$

$$400 \quad \textit{Recall} = \textit{TPR} = \frac{TP}{TP + FN}$$

401 The Precision is very sensitive to FP when the number of TP is relatively small. Therefore, the AUPRC  
402 metric is able to distinguish the performances in highly unbalanced data such as the annotations of sleep  
403 arousals.

#### 404 **Convolutional neural network architectures**

405 The classic U-Net architecture was adapted in DeepSleep. The original U-Net is a 2D convolutional neural  
406 network designed for 2D image segmentation<sup>24</sup>. We transformed the structure into 1D for the time-series  
407 sleep records and largely increased the number of convolutional layers from the original 18 to 35 for  
408 extracting the information at different scales. Similar to U-Net, we had convolution, max pooling and  
409 concatenation layers. The kernel size of 7 was used in the convolution operation and increasing the kernel  
410 size didn’t significantly change the performance. The nonlinear activation after each convolution operation  
411 is a Rectified Linear Unit (ReLU) defined as

$$412 \quad f(x) = \max(0, x)$$

413 where  $x$  is the input to a neuron and  $f(x)$  is the output. Only positive values active a neuron and ReLU  
414 allows for fast and effective training of neural networks compared to other complex activation functions.  
415 In addition, batch normalization was used after each convolutional layer. In the final output layer, we used  
416 the sigmoid activation unit defined as

$$417 \quad f(x) = \frac{1}{1 + e^{-x}}$$

418 where  $x$  is the input to a neuron and  $f(x)$  is the output. During the training process, the Adam optimizer was  
419 used with the learning rate of  $1e-4$  and the decay rate of  $1e-5$ .

420 Other network structures were also tested, including Long Short-Term Memory (LSTM) and Gated  
421 Recurrent Unit (GRU). They have similar performances. Therefore, we kept the U-Net based structure.

#### 422 **Training Losses**

423 The cross entropy loss, or log loss, was used for model training in DeepSleep. The cross entropy loss is  
424 defined as

425 
$$H(y, \hat{y}) = \sum_{i=1}^N [-y_i \cdot \log \hat{y}_i - (1 - y_i) \cdot \log (1 - \hat{y}_i)]$$

426 where  $y_i$  is the gold standard label of sleep=0 or arousal=1 at time point  $i$ ,  $\hat{y}_i$  is the prediction value at time  
427 point  $i$ ,  $N$  is the total number of time points,  $y$  is the vector of the gold standard labels and  $\hat{y}$  is the vector  
428 of predictions. Ideally, an “AUPRC loss” should be used for optimizing the prediction AUPRC. However,  
429 the “AUPRC loss” doesn’t exist because the AUPRC function is not mathematically differentiable, which  
430 is required in the neural network model training through the back-propagation algorithm<sup>38</sup>. Therefore, we  
431 need to use cross-entropy loss to approximate the “AUPRC loss”. Another option is using the Sorensen-  
432 dice coefficient defined as

433 
$$S(y, \hat{y}) = \frac{\sum_{i=1}^N (y_i \cdot \hat{y}_i)}{[\sum_{i=1}^N (y_i) + \sum_{i=1}^N (\hat{y}_i)]}$$

434 where  $y_i$  is the gold standard label of sleep=0 or arousal=1 at time point  $i$ ,  $\hat{y}_i$  is the prediction value at time  
435 point  $i$ ,  $N$  is the total number of time points,  $y$  is the vector of the gold standard labels and  $\hat{y}$  is the vector  
436 of predictions. We have tested the cross-entropy loss, the Sorensen dice loss and combining these two losses.  
437 Using the cross-entropy loss achieved the best performance in DeepSleep.

#### 438 Overall AUPRC and AUROC

439 The overall AUPRC, or the gross AUPRC, is defined as

440 
$$\text{AUPRC} = \sum_j P_j (R_j - R_{j+1})$$

441 
$$P_j = \frac{\text{number of arousal data points with predicted probability } (j/1000) \text{ or greater}}{\text{total number of data points with predicted probability } (j/1000) \text{ or greater}}$$

442 
$$R_j = \frac{\text{number of arousal data points with predicted probability } (j/1000) \text{ or greater}}{\text{total number of arousal data points}}$$

443 where the Precision ( $P_j$ ) and Recall ( $R_j$ ) were calculated at each cutoff  $j$  and  $j = 0, 0.001, 0.002, \dots, 0.998,$   
444  $0.999, 1$ . For a test dataset of multiple sleep records, this overall AUPRC is similar to the “weighted  
445 AUPRC”, which is different from simply averaging the AUPRC values of all test records. This is because  
446 the overall AUPRC considers the length of each record and longer records contributing more to the overall  
447 AUPRC, resulting in a more accurate performance description of a model. The overall AUPRC was also  
448 used as the primary scoring metric in the 2018 PhysioNet Challenge. The overall AUROC was defined in  
449 a similar way as the overall AUPRC.

#### 450 Validation on the SHHS datasets

451 The large publicly available Sleep Heart Health Study (SHHS) dataset contains 6,441 individuals in SHHS  
452 visit 1 (SHHS1) and 3,295 individuals in SHHS visit 2 (SHHS2). The SHHS1 dataset was collected between  
453 1995 and 1998, whereas the SHHS2 dataset was collected between 2001 and 2003. Since the recording  
454 montages were different among the PhysioNet, SHHS1, and SHHS2 datasets, the channels of

455 polysomnograms were also different. For the SHHS1 and SHHS2 datasets, we only used a subset of 7  
456 channels (SaO<sub>2</sub>, EEG-C3/A2, EEG-C4/A1, EOG-L, ECG, EMG, and Airflow), which were shared among  
457 these three datasets. In addition, the major signal sampling rates in the PhysioNet, SHHS1, and SHHS2  
458 were 200Hz, 125Hz, and 250Hz respectively. We down-sample the signals to the same 25Hz by averaging  
459 successive time points. Quantile normalization was used to address the potential cohort and batch effect.  
460 For both SHHS1 and SHHS2, we randomly selected 1,000 recordings, which was comparable to the number  
461 of recordings (n=994) in the PhysioNet training dataset. Then we applied DeepSleep pipeline to train,  
462 validate and test models on SHHS1 and SHHS2 datasets individually.

463

#### 464 **Data availability**

465 The datasets used in this study are publicly available at the 2018 PhysioNet Challenge website and the  
466 Sleep Heart Health Study website:

467 <https://physionet.org/physiobank/database/challenge/2018/>

468 <https://sleepdata.org/datasets/shhs>

#### 469 **Code availability**

470 The code of DeepSleep is available at:

471 <https://github.com/GuanLab/DeepSleep>

#### 472 **Author contributions**

473 YG and HL conceived and designed the winning algorithm in the 2018 PhysioNet Challenge. HY and YG  
474 implemented the code of various neural network structures and augmentation strategies. HY performed  
475 post-challenge analyses. All authors contributed to the writing of the manuscript and approved the final  
476 manuscript.

477

#### 478 **Acknowledgements**

479 This work is supported by NSF-US14-PAF07599 (CAREER: On-line Service for Predicting Protein  
480 Phosphorylation Dynamics Under Unseen Perturbations NSF), AWD007950 (Digital Biomarkers in Voices  
481 for Parkinson's Disease American Parkinson's Disease Association), University of Michigan O'Brien  
482 Kidney Translational Core Center, 19AMTG34850176 (American Heart Association and Amazon Web  
483 Services3.0 Data Grant Portfolio: Artificial Intelligence and Machine Learning Training Grants), and  
484 Michael J. Fox Foundation #17373. We thank the GPU donation from Nvidia.

485

#### 486 **References**

- 487 1. Mukherjee, S. *et al.* An Official American Thoracic Society Statement: The Importance of Healthy  
488 Sleep. Recommendations and Future Priorities. *Am. J. Respir. Crit. Care Med.* **191**, 1450–1458  
489 (2015).



- 490 2. St-Onge, M.-P. Sleep-obesity relation: underlying mechanisms and consequences for treatment.  
491 *Obes. Rev.* **18 Suppl 1**, 34–39 (2017).
- 492 3. Paiva, T., Gaspar, T. & Matos, M. G. Sleep deprivation in adolescents: correlations with health  
493 complaints and health-related quality of life. *Sleep Med.* **16**, 521–527 (2015).
- 494 4. Tobaldini, E. *et al.* Sleep, sleep deprivation, autonomic nervous system and cardiovascular diseases.  
495 *Neurosci. Biobehav. Rev.* **74**, 321–329 (2017).
- 496 5. Lewis, N. C. S. *et al.* Influence of nocturnal and daytime sleep on initial orthostatic hypotension.  
497 *Eur. J. Appl. Physiol.* **115**, 269–276 (2015).
- 498 6. Banks, S. & Dinges, D. F. Behavioral and physiological consequences of sleep restriction. *J. Clin.*  
499 *Sleep Med.* **3**, 519–528 (2007).
- 500 7. Vitiello, M. V. The interrelationship of sleep and depression: new answers but many questions  
501 remain. *Sleep Med.* **52**, 230–231 (2018).
- 502 8. Liu, Y. *et al.* Prevalence of Healthy Sleep Duration among Adults — United States, 2014. *MMWR*  
503 *Morb. Mortal. Wkly. Rep.* **65**, 137–141 (2016).
- 504 9. Hillman, D. *et al.* The economic cost of inadequate sleep. *Sleep* **41**, (2018).
- 505 10. Ford, E. S., Cunningham, T. J., Giles, W. H. & Croft, J. B. Trends in insomnia and excessive  
506 daytime sleepiness among U.S. adults from 2002 to 2012. *Sleep Med.* **16**, 372–378 (2015).
- 507 11. Kronholm, E. *et al.* Prevalence of insomnia-related symptoms continues to increase in the Finnish  
508 working-age population. *J. Sleep Res.* **25**, 454–457 (2016).
- 509 12. Halasz, P., Terzano, M., Parrino, L. & Bodizs, R. The nature of arousal in sleep. *J. Sleep Res.* **13**, 1–  
510 23 (2004).
- 511 13. Bonnet, M. H. Effect of Sleep Disruption on Sleep, Performance, and Mood. *Sleep* **8**, 11–19 (1985).
- 512 14. Bonnet, M. H. Performance and Sleepiness as a Function of Frequency and Placement of Sleep  
513 Disruption. *Psychophysiology* **23**, 263–271 (1986).
- 514 15. Mukherjee, S. *et al.* An Official American Thoracic Society Statement: The Importance of Healthy  
515 Sleep. Recommendations and Future Priorities. *Am. J. Respir. Crit. Care Med.* **191**, 1450–1458

- 516 (2015).
- 517 16. Berry, R. B. *et al.* AASM Scoring Manual Updates for 2017 (Version 2.4). *J. Clin. Sleep Med.* **13**,  
518 665–666 (2017).
- 519 17. Olsen, M. *et al.* Automatic, electrocardiographic-based detection of autonomic arousals and their  
520 association with cortical arousals, leg movements, and respiratory events in sleep. *Sleep* **41**, (2018).
- 521 18. Basner, M., Griefahn, B., Müller, U., Plath, G. & Samel, A. An ECG-based Algorithm for the  
522 Automatic Identification of Autonomic Activations Associated with Cortical Arousal. *Sleep* **30**,  
523 1349–1361 (2007).
- 524 19. Behera, C. K., Reddy, T. K., Behera, L. & Bhattacharya, B. Artificial neural network based arousal  
525 detection from sleep electroencephalogram data. in *2014 International Conference on Computer,*  
526 *Communications, and Control Technology (I4CT)* 458–462 (IEEE, 2014).
- 527 20. Fernández-Varela, I., Hernández-Pereira, E., Álvarez-Estévez, D. & Moret-Bonillo, V. Combining  
528 machine learning models for the automatic detection of EEG arousals. *Neurocomputing* **268**, 100–  
529 108 (2017).
- 530 21. Alvarez-Estevéz, D. & Fernández-Varela, I. Large-scale validation of an automatic EEG arousal  
531 detection algorithm using different heterogeneous databases. *Sleep Med.* (2019).  
532 doi:10.1016/j.sleep.2019.01.025
- 533 22. Ghassemi, M. *et al.* You Snooze, You Win: The PhysioNet/Computing in Cardiology Challenge  
534 2018. in *2018 Computing in Cardiology Conference (CinC)* **45**, (Computing in Cardiology, 2018).
- 535 23. Guan, Y. Waking up to data challenges. *Nature Machine Intelligence* **1**, 67–67 (2019).
- 536 24. Ronneberger, O., Fischer, P. & Brox, T. U-Net: Convolutional Networks for Biomedical Image  
537 Segmentation. in *Lecture Notes in Computer Science* 234–241 (2015).
- 538 25. Biswal, S. *et al.* Expert-level sleep scoring with deep neural networks. *J. Am. Med. Inform. Assoc.*  
539 **25**, 1643–1650 (2018).
- 540 26. Alvarez-Estévez, D. & Moret-Bonillo, V. Identification of electroencephalographic arousals in  
541 multichannel sleep recordings. *IEEE Trans. Biomed. Eng.* **58**, 54–63 (2011).

- 542 27. Phan, H., Andreotti, F., Cooray, N., Chen, O. Y. & De Vos, M. SeqSleepNet: End-to-End  
543 Hierarchical Recurrent Neural Network for Sequence-to-Sequence Automatic Sleep Staging. *IEEE*  
544 *Trans. Neural Syst. Rehabil. Eng.* (2019). doi:10.1109/TNSRE.2019.2896659
- 545 28. Phan, H., Andreotti, F., Cooray, N., Chen, O. Y. & Vos, M. D. Automatic Sleep Stage Classification  
546 Using Single-Channel EEG: Learning Sequential Features with Attention-Based Recurrent Neural  
547 Networks. *Conf. Proc. IEEE Eng. Med. Biol. Soc.* **2018**, 1452–1455 (2018).
- 548 29. Sun, H. *et al.* Large-Scale Automated Sleep Staging. *Sleep* **40**, (2017).
- 549 30. Sors, A., Bonnet, S., Mirek, S., Vercueil, L. & Payen, J.-F. A convolutional neural network for sleep  
550 stage scoring from raw single-channel EEG. *Biomed. Signal Process. Control* **42**, 107–114 (2018).
- 551 31. Quan, S. F. *et al.* The Sleep Heart Health Study: design, rationale, and methods. *Sleep* **20**, 1077–  
552 1085 (1997).
- 553 32. Li, H., Panwar, B., Omenn, G. S. & Guan, Y. Accurate prediction of personalized olfactory  
554 perception from large-scale chemoinformatic features. *Gigascience* **7**, (2018).
- 555 33. LeCun, Y., Bengio, Y. & Hinton, G. Deep learning. *Nature* **521**, 436–444 (2015).
- 556 34. Litjens, G. *et al.* A survey on deep learning in medical image analysis. *Med. Image Anal.* **42**, 60–88  
557 (2017).
- 558 35. Jiang, Y. Q. *et al.* Recognizing Basal Cell Carcinoma on Smartphone-Captured Digital  
559 Histopathology Images with Deep Neural Network. *British Journal of Dermatology* (2019).  
560 doi:10.1111/bjd.18026
- 561 36. Li, H., Li, T., Quang, D. & Guan, Y. Network Propagation Predicts Drug Synergy in Cancers.  
562 *Cancer Res.* **78**, 5446–5457 (2018).
- 563 37. Li, H., Quang, D. & Guan, Y. Anchor: trans-cell type prediction of transcription factor binding sites.  
564 *Genome Res.* **29**, 281–292 (2019).
- 565 38. Rumelhart, D. E., Hinton, G. E. & Williams, R. J. Learning representations by back-propagating  
566 errors. *Nature* **323**, 533–536 (1986).

567 **Supplementary Materials**

568

569 **DeepSleep: Fast and Accurate Delineation of Sleep Arousals at Millisecond Resolution by Deep**  
570 **Learning**

571 Hongyang Li<sup>1</sup>, Yuanfang Guan<sup>1,\*</sup>

572 1. Department of Computational Medicine and Bioinformatics, University of Michigan, 100 Washtenaw  
573 Avenue, Ann Arbor, MI 48109, USA

574 \* Corresponding author: [gyuanfan@umich.edu](mailto:gyuanfan@umich.edu)

575

576

577

578

579

580

581

582

583

584

585

586

587

588

589

590

591

592

593

594

595

596

597

598

599

600

601

602

603

604

605

606

607

608 **The system configuration to test DeepSleep runtimes**

609

610 **CPU**

611 Architecture: x86\_64  
612 CPU op-mode(s): 32-bit, 64-bit  
613 Byte Order: Little Endian  
614 CPU(s): 8  
615 On-line CPU(s) list: 0-7  
616 Thread(s) per core: 2  
617 Core(s) per socket: 4  
618 Socket(s): 1  
619 NUMA node(s): 1  
620 Vendor ID: GenuineIntel  
621 CPU family: 6  
622 Model: 94  
623 Model name: Intel(R) Core(TM) i7-6700K CPU @ 4.00GHz  
624 Stepping: 3  
625 CPU MHz: 4000.000  
626 BogomIPS: 8015.88  
627 Virtualization: VT-x  
628 L1d cache: 32K  
629 L1i cache: 32K  
630 L2 cache: 256K  
631 L3 cache: 8192K  
632 NUMA node0 CPU(s): 0-7

633

634 **GPU**

635 NVIDIA GeForce GTX TITAN X

636

637 **Memory**

638 31GB in total

639

640 **System**

641 Linux version 4.4.16-1.el7.elrepo.x86\_64 (mockbuild@Build64R7) (gcc version 4.8.5 20150623 (Red Hat  
642 4.8.5-4) (GCC) ) #1 SMP Wed Jul 27 15:27:40 EDT 2016

643

644

645

646

647

648

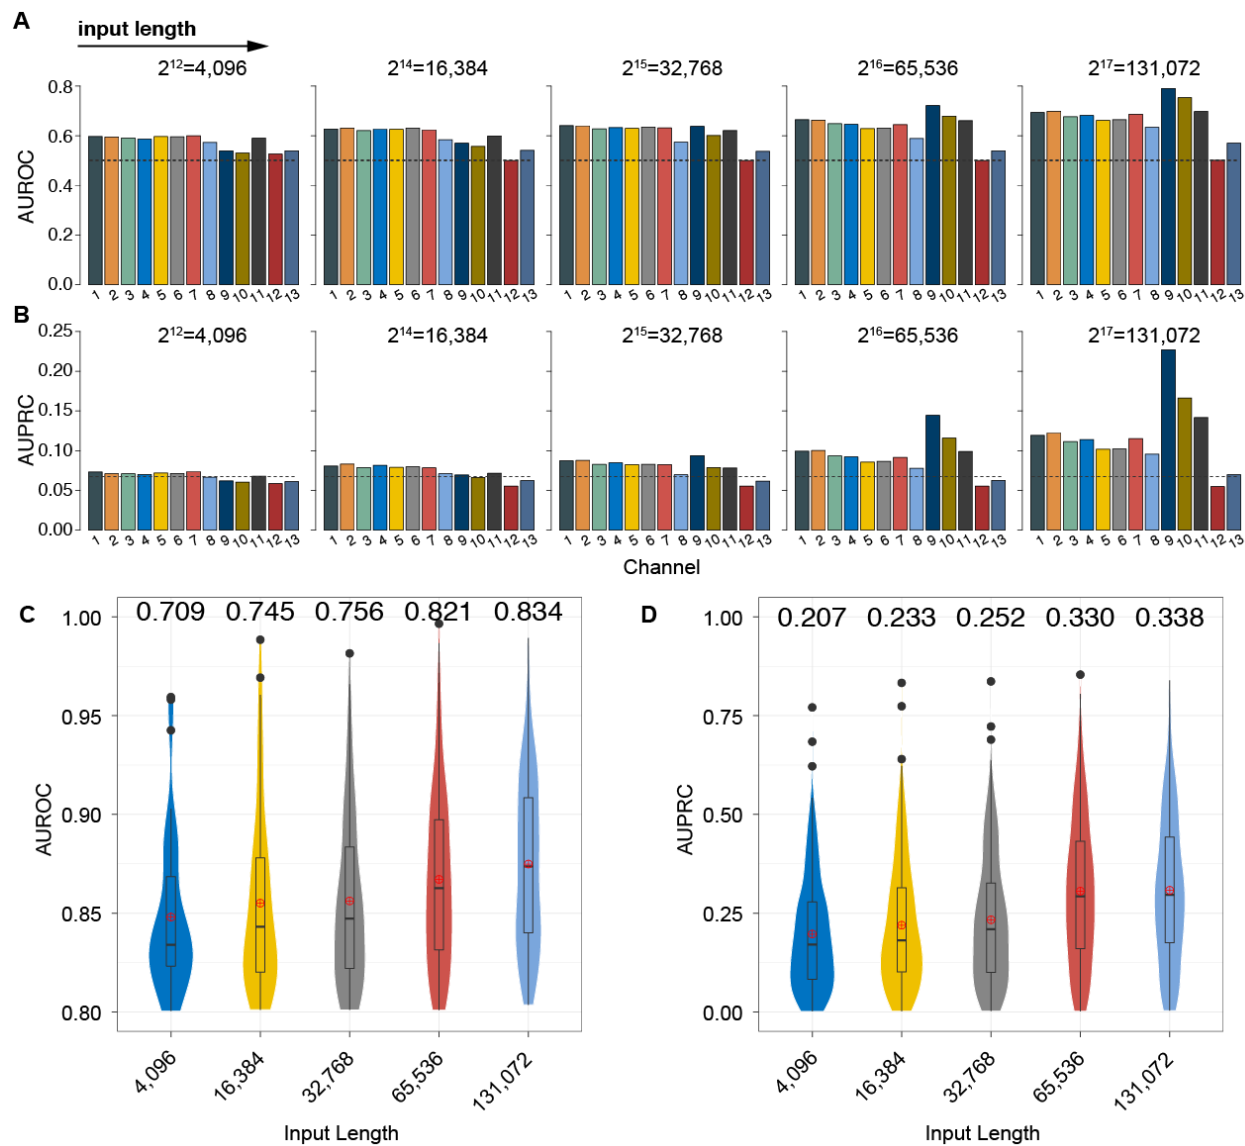

649

650 **Fig. S1. The prediction performances of models using various lengths of polysomnographic**  
 651 **recordings as input.**

652 The (A) AUROCs and (B) AUPRCs of models using different lengths of polysomnographic recordings as  
 653 input. From left to right, the length of input gradually increases from 4,096 (about 20 seconds) to 131,072  
 654 (about 11 minutes). Each color represents a model using one of the 13 polysomnographic signals. These  
 655 signals correspond to the 13 channels from top to bottom in **Fig. 1 - “Data”**: 1. F3-M2; 2. F4-M1; 3. C3-  
 656 M2; 4. C4-M1; 5. O1-M2; 6. O2-M1; 7. E1-M2; 8. Chin; 9. ABD; 10. Chest; 11. Airflow; 12. SaO<sub>2</sub>; 13.  
 657 ECG. The dashed lines represent the baseline of random predictions in the AUROC space (baseline=0.500)  
 658 and the AUPRC space (baseline=0.072). In contrast to (A) and (B) where a single channel was used as  
 659 input, all 13 channels were used together as input features in (C) and (D). Longer input lengths achieved  
 660 higher AUPRCs and AUROCs. The value above each violin is the overall AUPRC/AUROC, which is  
 661 different from the simple mean or median value. The overall AUPRC/AUROC considers the length of each  
 662 record and longer records contribute more to the overall AUPRC/AUROC (see details in **Methods -**  
 663 **Overall AUPRC and AUROC**).

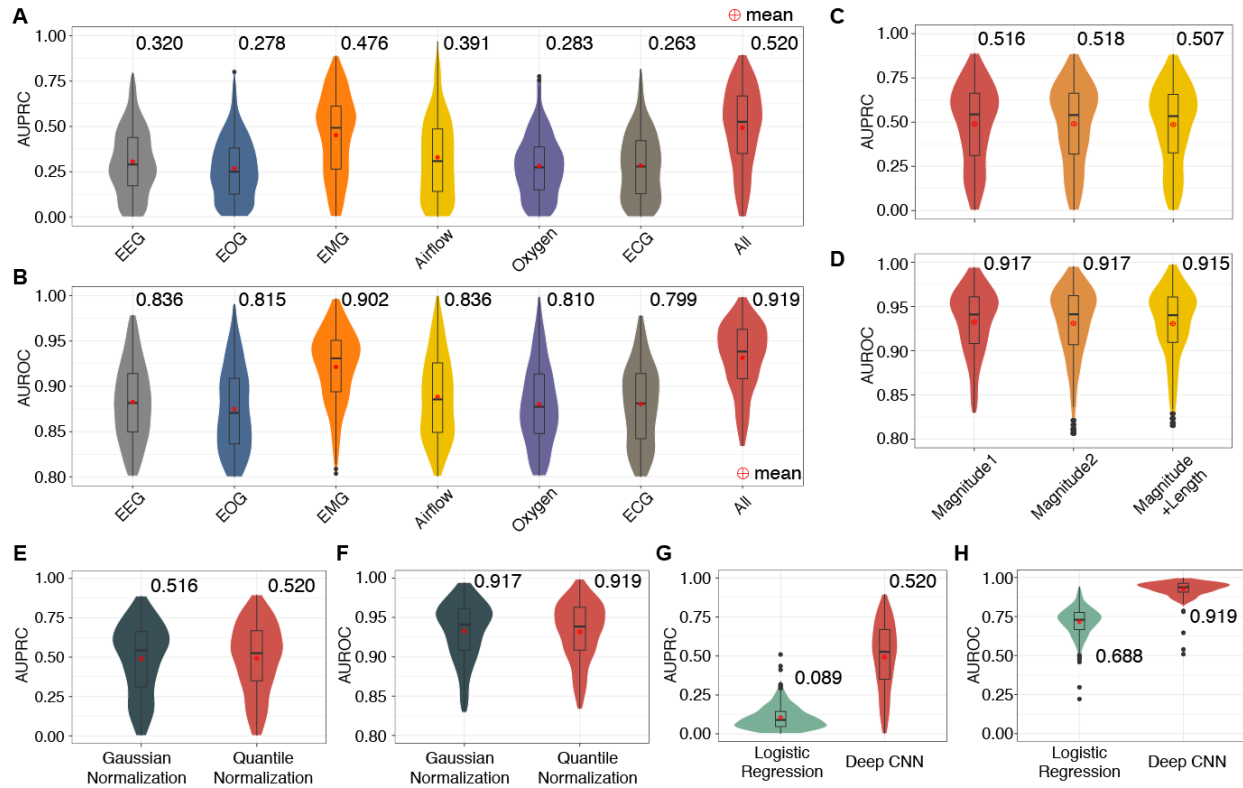

664  
665  
666

**Fig. S2. The performance comparison of models using different types of polysomnographic signals, augmentation strategies, normalization methods.**

667 From left to right, the first six categories are EEG (channel 1-6), EOG (channel 7), EMG (channel 8-10),  
668 Airflow (channel 11), saturation of Oxygen (channel 12) and ECG (channel 13). The last one, “All”,  
669 represents the model using all these 13 channels as input. The prediction (A) AUPRCs and (B) AUROCs  
670 of models using different types of signals are shown in different colors. Of note, the model “All” using all  
671 13 polysomnographic signals achieved the best performance. We further compared the prediction (C)  
672 AUPRCs and (D) AUROCs of different data augmentation strategies are. The “Magnitude 1” strategy  
673 means that each training record was multiplied by a random number between 0.90 and 1.15, to simulate the  
674 fluctuation of the measurement in real life. The “Magnitude 2” strategy was the same as “Magnitude 1”,  
675 except for the range of the random number becomes wider, between 0.80 and 1.25. These two strategies  
676 had almost the same performance. The last “Magnitude+Length” strategy was built on top of “Magnitude  
677 1”, in which we further extended or shrunk the record along the time axis by a random number between  
678 0.90 and 1.15. This strategy decreased the performance and was not used in the final model training. In  
679 addition, the prediction (E) AUPRCs and (F) AUROCs of the Gaussian normalization and the quantile  
680 normalization were compared. In the Gaussian normalization, we first subtracted the average value of a  
681 signal then divided the signal by the standard deviation for each sleep record. In the quantile normalization,  
682 we first calculated the average of all training records as the reference record. Then for each record, we  
683 quantile normalized it to the reference record. The quantile normalization had better performance. We also  
684 compared the prediction (G) AUPRCs and (H) AUROCs of deep convolutional neural network (CNN) and  
685 logistic regression. Clearly, the deep CNN had much higher performance in terms of both AUPRC and  
686 AUROC. The value above each violin is the overall AUPRC/AUROC, which is different from the simple

687 mean or median value. The overall AUPRC/AUROC considers the length of each record and longer records  
 688 contribute more to the overall AUPRC/AUROC (see details in **Methods - Overall AUPRC and AUROC**).  
 689  
 690

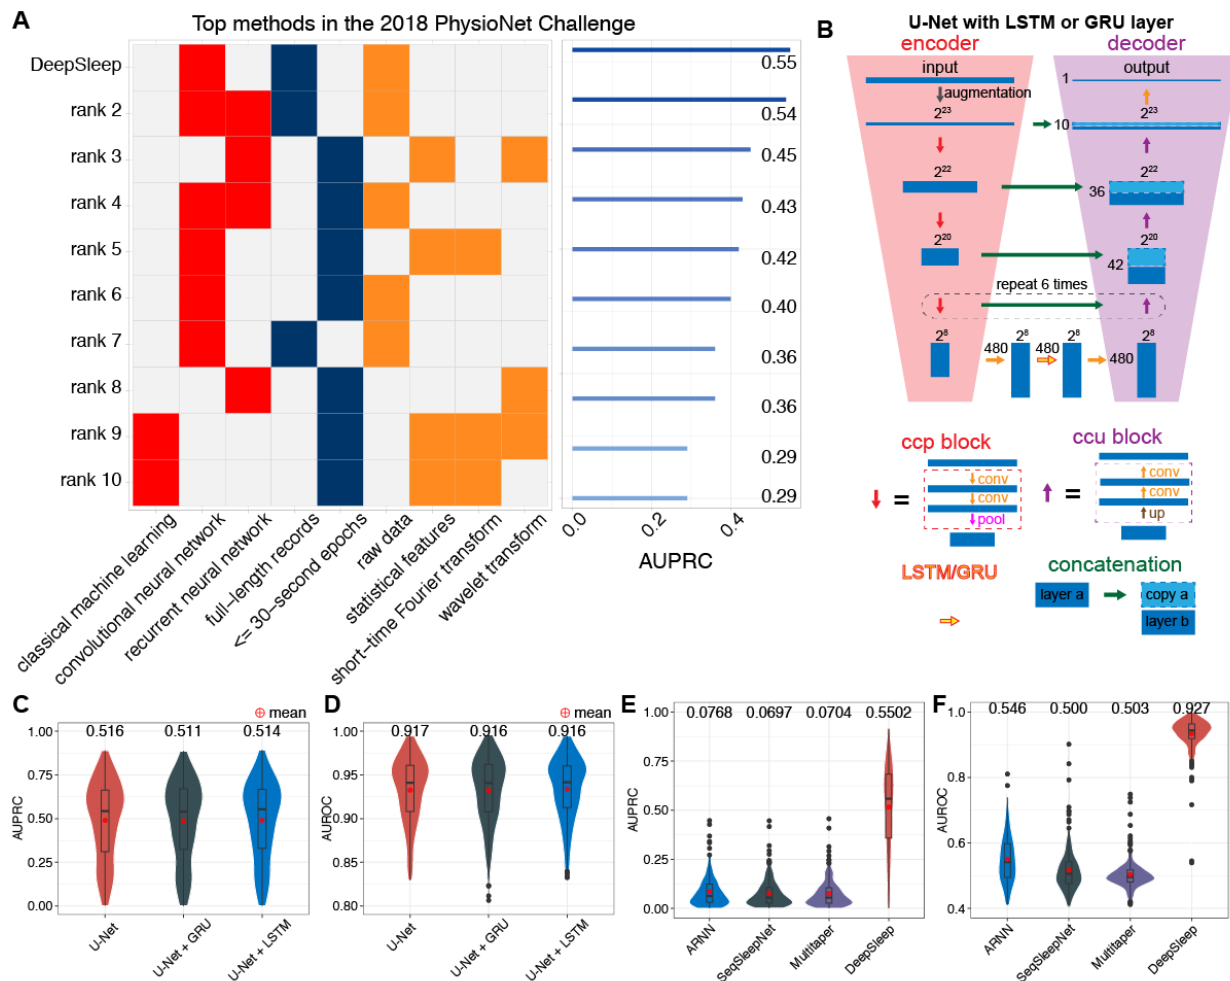

691  
 692 **Fig. S3. The comparison of top 10 teams in the 2018 PhysioNet Challenge, recurrent neural network,**  
 693 **and sleep staging methods.**

694 (A) In the left panel, top methods, rank 2<sup>1</sup>, rank 3<sup>2</sup>, rank 4<sup>3</sup>, rank 5<sup>4</sup>, rank 6<sup>5</sup>, rank 7<sup>6</sup>, rank 8<sup>7</sup>, rank 9<sup>8</sup>,  
 695 rank 10<sup>9</sup> are compared in terms of machine learning models (red blocks), input length for models (blue  
 696 blocks), and the types of input (orange blocks). In particular, the input are either raw polysomnogram data,  
 697 or features extracted by statistical analysis, short-time Fourier transform, or wavelet transform. The  
 698 corresponding prediction performances of these methods are shown in the right panel. We also implemented  
 699 the recurrent neural network (RNN) structure by adding a recurrent unit of LSTM or GRU layer (yellow  
 700 arrow with red border) at the bottom of U-Net (B). The arrows in different colors represent different neural  
 701 network layers, blocks or operations. The prediction (C) AUPRCs and (D) AUROCs of U-Net, U-Net with  
 702 GRU and U-Net with LSTM are shown in different colors. Adding the recurrent layer did not improve the  
 703 performance. We used U-Net without recurrent layers as in our final model. We further compared current  
 704 methods for sleep staging. The prediction (E) AUPRCs and (F) AUROCs of (a) attention recurrent neural



705 network (ARNN)<sup>10</sup>, (b) SeqSleepNet using features from short-time Fourier transform<sup>11,12</sup>, (c) a method  
 706 using features from Thomson’s multitaper<sup>13,14</sup>, and (d) our DeepSleep approach are shown in different  
 707 colors. The value above each violin is the overall AUPRC/AUROC, which is different from the simple  
 708 mean or median value. The overall AUPRC/AUROC considers the length of each record and longer records  
 709 contribute more to the overall AUPRC/AUROC (see details in **Methods - Overall AUPRC and AUROC**).  
 710  
 711

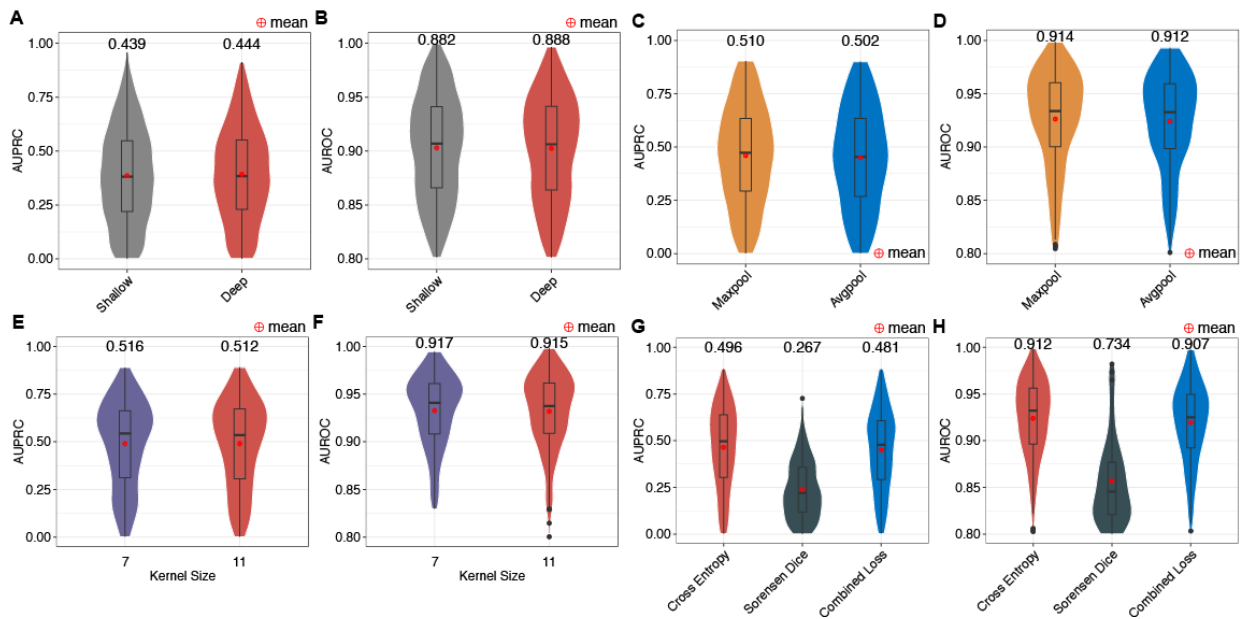

712

713 **Fig. S4. The performance comparison of U-Net with different modifications.**

714 The prediction (A) AUPRCs and (B) AUROCs of the “Shallow” and “Deep” U-Net were compared. The  
 715 “Shallow” structure is only relatively shallow (4 less convolutional layers), compared with the “Deep”  
 716 structure. Nevertheless, the “Shallow” U-Net already showed worse prediction performance than the “Deep”  
 717 one. The prediction (C) AUPRCs and (D) AUROCs of U-Net with the kernel size of 7 and 11 in the  
 718 convolutional layers were compared. Since the performances were very similar and the kernel size of 11  
 719 required more computational time and sources, we used the kernel size of 7 in our model. The prediction  
 720 (E) AUPRCs and (F) AUROCs of U-Net with max-pooling or average-pooling layers are also compared.  
 721 Using max-pooling layers has slightly higher performance, which was implemented in our model. The  
 722 prediction (G) AUPRCs and (H) AUROCs of models trained with the cross-entropy loss, the sorensen dice  
 723 loss or combining both losses were further tested. The cross-entropy loss significantly outperformed the  
 724 sorensen dice loss. Even if we combined both losses, the performance was still lower. Therefore, we used  
 725 the cross-entropy loss function to train our model. The value above each model is the overall  
 726 AUPRC/AUROC, which is different from the simple mean or median value. The overall AUPRC/AUROC  
 727 considers the length of each record and longer records contribute more to the overall AUPRC/AUROC (see  
 728 details in **Methods - Overall AUPRC and AUROC**).

729

730

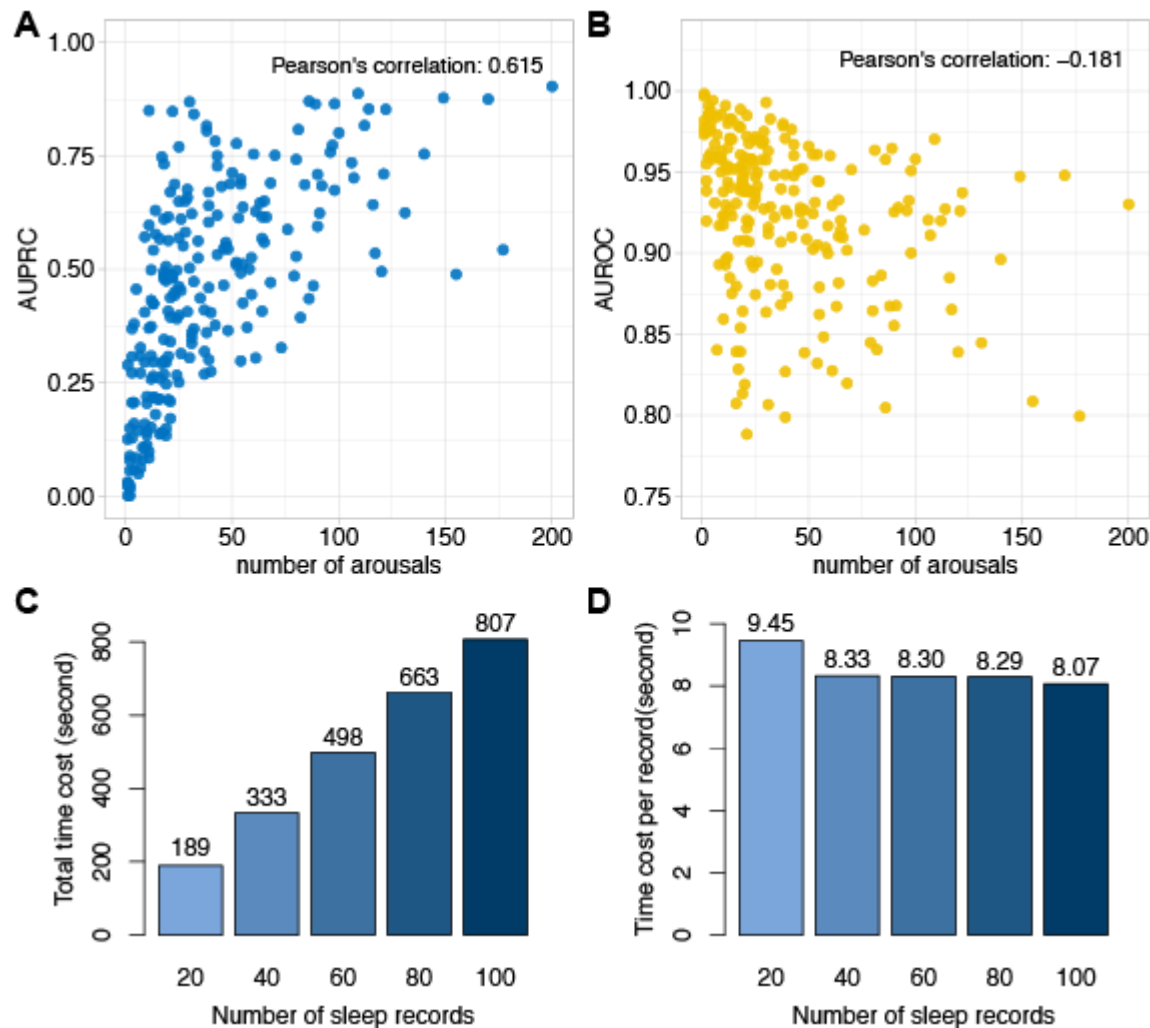

731

732 **Fig. S5. The relationship between prediction performance and the number of arousals, and the**  
733 **runtimes for predicting sleep arousals.**

734 The prediction (A) AUPRCs and (B) AUROCs are shown by the y-axis. Each dot represents one sleep  
735 record. The AUPRC has a medium correlation with the number of sleep arousals. The (C) total time cost  
736 and (D) average time cost per sleep record are shown in bar plots. Notably, the average runtime per sleep  
737 record is less than 10 seconds and gradually decreases as the total number of records to be analyzed  
738 increases. This results from the overhead time of loading the large neural network models before the  
739 prediction step.

740

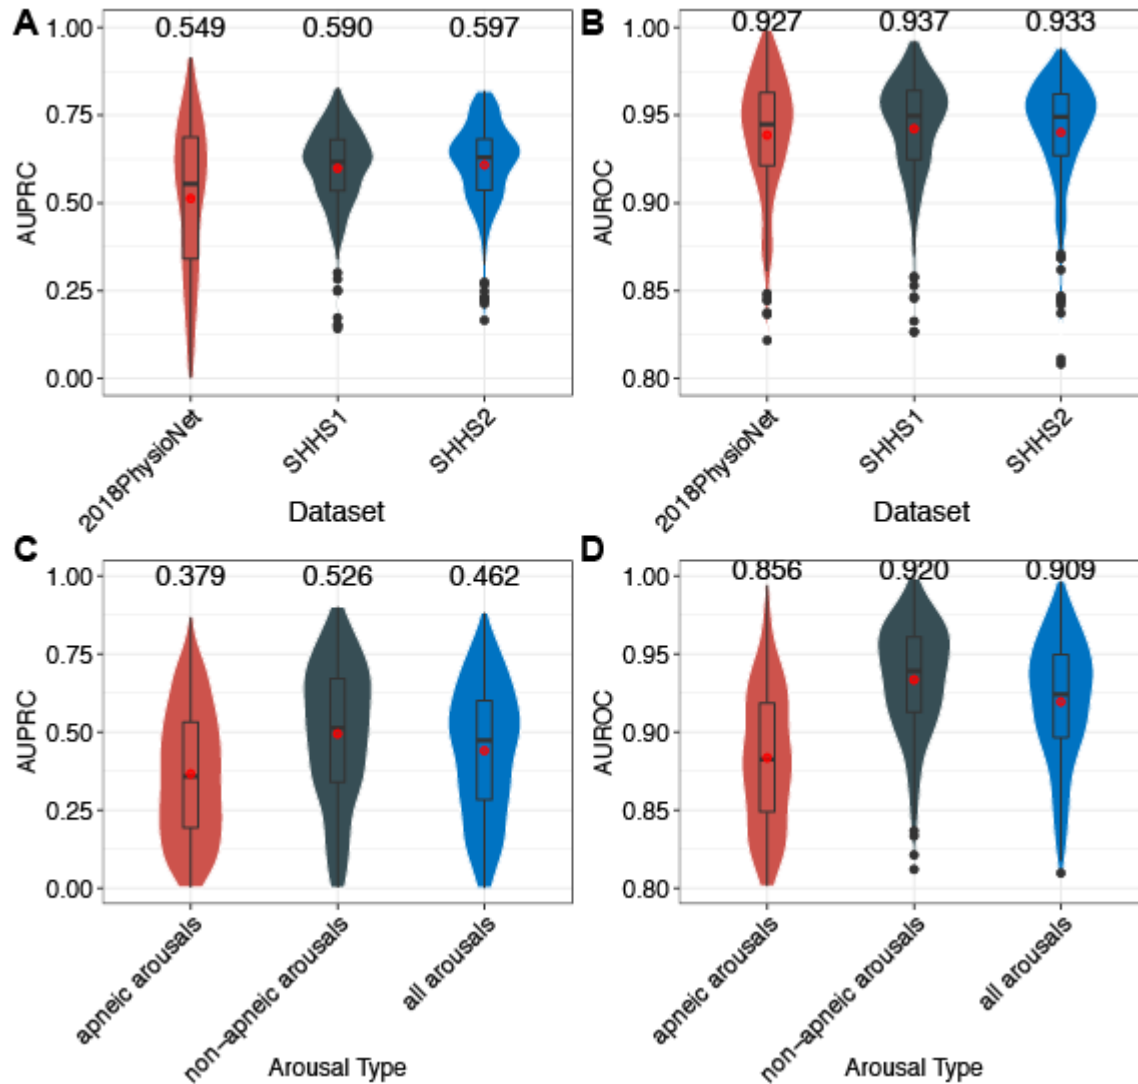

741  
742

743 **Fig. S6. The performance comparison of DeepSleep on different datasets and different types of**  
744 **arousals**

745 The prediction (A) AUPRCs and (B) AUROCs of DeepSleep on the 2018-PhysioNet, Sleep Heart Health  
746 Study visit 1 (SHHS1), and SHHS2 datasets were compared. The performance on these three datasets was  
747 comparable. We further tested the prediction (C) AUPRCs and (D) AUROCs of DeepSleep on apneic, non-  
748 apneic, and all (both apneic and non-apneic) arousals. The value above each violin is the overall  
749 AUPRC/AUROC, which is different from the simple mean or median value. The overall AUPRC/AUROC  
750 considers the length of each record and longer records contribute more to the overall AUPRC/AUROC (see  
751 details in **Methods - Overall AUPRC and AUROC**).

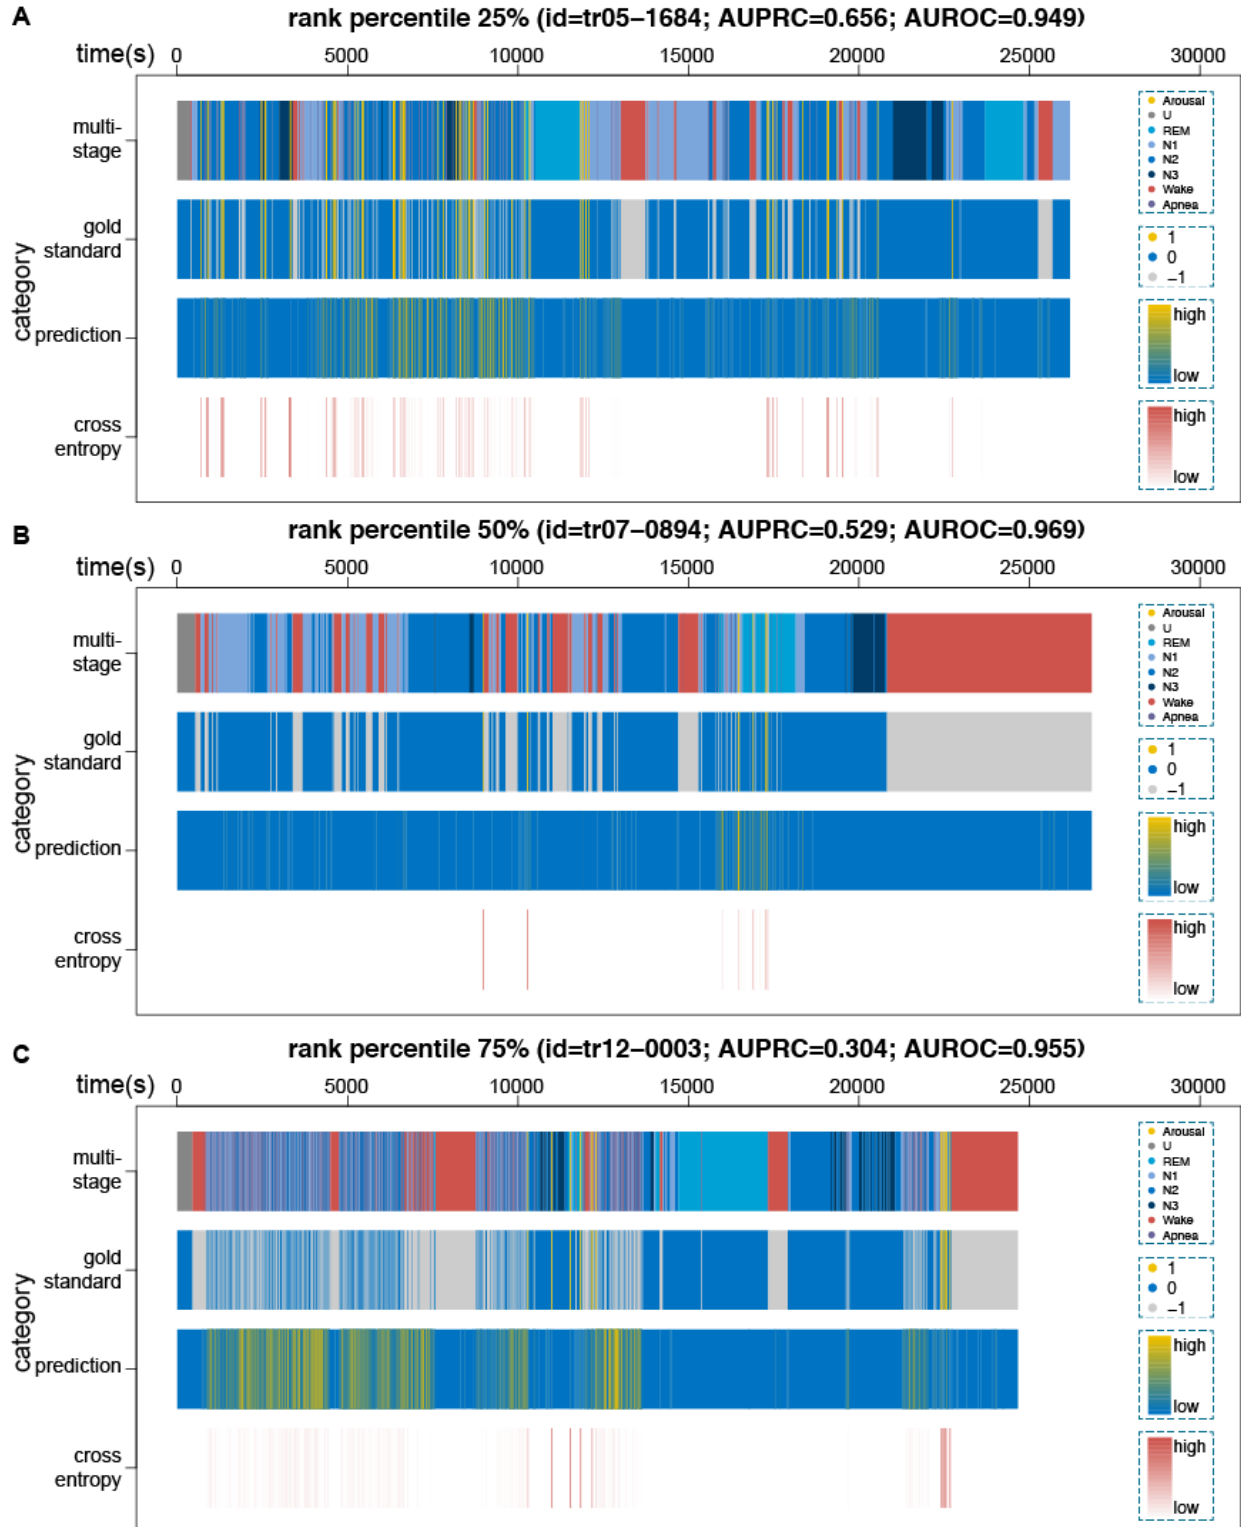

752  
753

754 **Fig. S7. Visualization of our prediction and the gold standard annotation for three sleep records with**  
 755 **rank percentile 25%, 50%, and 75% based on the prediction AUPRC.**

756 From top to bottom along the y-axis, the four rows correspond to the 8 annotation categories, the binary  
 757 label of arousal (yellow) and sleep (blue), excluding the non-scoring regions (gray), the continuous  
 758 prediction and the cross entropy loss at each data point. The sleep records in **(A)**, **(B)**, and **(C)** were ranked  
 759 25%, 50%, and 75% respectively among all records based on the prediction AUPRC.  
 760

761 **Table S1. The relationship between length of segments and the corresponding time.**

762

| length of segments(number of data points) | the corresponding time       |
|-------------------------------------------|------------------------------|
| $2^{23} = 8,388,608$                      | 41,943 seconds / 11.65 hours |
| $2^{22} = 4,194,304$                      | 20,972 seconds / 5.83 hours  |
| $2^{21} = 2,097,152$                      | 10486 seconds / 2.91 hours   |
| $2^{20} = 1,048,576$                      | 5,243 seconds / 1.46 hours   |
| $2^{19} = 524,288$                        | 2,621 seconds / 43.7 minutes |
| $2^{18} = 262,144$                        | 1,311 seconds / 21.8 minutes |
| $2^{17} = 131,072$                        | 655 seconds / 10.9 minutes   |
| $2^{16} = 65,536$                         | 328 seconds / 5.5 minutes    |
| $2^{15} = 32,768$                         | 164 seconds / 2.7 minutes    |
| $2^{14} = 16,384$                         | 82 seconds / 1.4 minutes     |
| $2^{13} = 8,192$                          | 40.96 seconds                |
| $2^{12} = 4,096$                          | 20.48 seconds                |
| $2^{11} = 2,048$                          | 10.24 seconds                |
| $2^{10} = 1,024$                          | 5.12 seconds                 |
| $2^9 = 512$                               | 2.56 seconds                 |
| $2^8 = 256$                               | 1.28 seconds                 |

763

764

765

766

767

768 **References**

769 1. Howe-Patterson, M., Pourbabae, B. & Benard, F. Automated Detection of Sleep Arousals From

770 Polysomnography Data Using a Dense Convolutional Neural Network. in *2018 Computing in*

771 *Cardiology Conference (CinC) 45*, (Computing in Cardiology, 2018).

772 2. Már Bráinsson, H. *et al.* Automatic Detection of Target Regions of Respiratory Effort-Related

773 Arousals Using Recurrent Neural Networks. in *2018 Computing in Cardiology Conference (CinC)*

- 774           45, (Computing in Cardiology, 2018).
- 775    3.   He, R. *et al.* Identification of Arousals With Deep Neural Networks Using Different Physiological  
776       Signals. in *2018 Computing in Cardiology Conference (CinC)* 45, (Computing in Cardiology, 2018).
- 777    4.   Varga, B., Görög, M. & Hajas, P. Using Auxiliary Loss to Improve Sleep Arousal Detection With  
778       Neural Network. in *2018 Computing in Cardiology Conference (CinC)* 45, (Computing in  
779       Cardiology, 2018).
- 780    5.   Patane, A., Ghiasi, S., Pasquale Scilingo, E. & Kwiatkowska, M. Automated Recognition of Sleep  
781       Arousal Using Multimodal and Personalized Deep Ensembles of Neural Networks. in *2018*  
782       *Computing in Cardiology Conference (CinC)* 45, (Computing in Cardiology, 2018).
- 783    6.   Miller, D., Ward, A. & Bambos, N. Automatic Sleep Arousal Identification From Physiological  
784       Waveforms Using Deep Learning. in *2018 Computing in Cardiology Conference (CinC)* 45,  
785       (Computing in Cardiology, 2018).
- 786    7.   Warrick, P. & Nabhan Homsy, M. Sleep Arousal Detection From Polysomnography Using the  
787       Scattering Transform and Recurrent Neural Networks. in *2018 Computing in Cardiology Conference*  
788       *(CinC)* 45, (Computing in Cardiology, 2018).
- 789    8.   Bhattacharjee, T. *et al.* SleepTight: Identifying Sleep Arousals Using Inter and Intra-Relation of  
790       Multimodal Signals. in *2018 Computing in Cardiology Conference (CinC)* 45, (Computing in  
791       Cardiology, 2018).
- 792    9.   Szalma, J., Bánhalmi, A. & Bilicki, V. Detection of Respiratory Effort-Related Arousals Using a  
793       Hidden Markov Model and Random Decision Forest. in *2018 Computing in Cardiology Conference*  
794       *(CinC)* 45, (Computing in Cardiology, 2018).
- 795    10.   Phan, H., Andreotti, F., Cooray, N., Chen, O. Y. & De Vos, M. Joint Classification and Prediction  
796       CNN Framework for Automatic Sleep Stage Classification. *IEEE Trans. Biomed. Eng.* (2018).  
797       doi:10.1109/TBME.2018.2872652
- 798    11.   Phan, H., Andreotti, F., Cooray, N., Chen, O. Y. & De Vos, M. SeqSleepNet: End-to-End  
799       Hierarchical Recurrent Neural Network for Sequence-to-Sequence Automatic Sleep Staging. *IEEE*

- 800            *Trans. Neural Syst. Rehabil. Eng.* (2019). doi:10.1109/TNSRE.2019.2896659
- 801    12. Phan, H., Andreotti, F., Cooray, N., Chen, O. Y. & Vos, M. D. Automatic Sleep Stage Classification
- 802            Using Single-Channel EEG: Learning Sequential Features with Attention-Based Recurrent Neural
- 803            Networks. *Conf. Proc. IEEE Eng. Med. Biol. Soc.* **2018**, 1452–1455 (2018).
- 804    13. Biswal, S. *et al.* Expert-level sleep scoring with deep neural networks. *J. Am. Med. Inform. Assoc.*
- 805            **25**, 1643–1650 (2018).
- 806    14. Sun, H. *et al.* Large-Scale Automated Sleep Staging. *Sleep* **40**, (2017).

807

808
